# Supplementary material for: Diketopiperazine Alkaloids and Bisabolene Sesquiterpenoids from Aspergillus versicolor AS-212, an Endozoic Fungus Associated with Deep-Sea Coral of Magellan Seamounts
Source: MDPI journal article supplement (doi:10.3390/md21050293), 2023-05-10
Supplement: s1 [file s1]

## Supplementary Material

### Diketopiperazine Alkaloids and Bisabolene Sesquiterpenoids from *Aspergillus versicolor* AS-212, an Endozoic Fungus Associated with Deep-Sea Coral of Magellan Seamounts

#### Content

- Figure S1.** HRESI mass spectrum of compound **1**;
- Figure S2.**  $^1\text{H}$  NMR (500 MHz, DMSO- $d_6$ ) spectrum of compound **1**;
- Figure S3.**  $^{13}\text{C}$  NMR (125 MHz, DMSO- $d_6$ ) and DEPT spectra of compound **1**;
- Figure S4.** COSY spectrum of compound **1**;
- Figure S5.** HSQC spectrum of compound **1**;
- Figure S6.** HMBC spectrum of compound **1**;
- Figure S7.** NOESY spectrum of compound **1**;
- Figure S8.** HRESI mass spectrum of compound **2**;
- Figure S9.**  $^1\text{H}$  NMR (500 MHz,  $\text{CDCl}_3$ ) spectrum of compound **2**;
- Figure S10.**  $^{13}\text{C}$  NMR (125 MHz,  $\text{CDCl}_3$ ) and DEPT spectra of compound **2**;
- Figure S11.** COSY spectrum of compound **2**;
- Figure S12.** HSQC spectrum of compound **2**;
- Figure S13.** HMBC spectrum of compound **2**;
- Figure S14.** NOESY spectrum of compound **2**;
- Figure S15.**  $^1\text{H}$  NMR (500 MHz, DMSO- $d_6$ ) spectrum of compound **3**;
- Figure S16.**  $^{13}\text{C}$  NMR (125 MHz, DMSO- $d_6$ ) and DEPT spectra of compound **3**;
- Figure S17.** HRESI mass spectrum of compound **4**;
- Figure S18.**  $^1\text{H}$  NMR (500 MHz, DMSO- $d_6$ ) spectrum of compound **4**;
- Figure S19.**  $^{13}\text{C}$  NMR (125 MHz, DMSO- $d_6$ ) and DEPT spectra of compound **4**;
- Figure S20.** COSY spectrum of compound **4**;
- Figure S21.** HSQC spectrum of compound **4**;
- Figure S22.** HMBC spectrum of compound **4**;
- Figure S23.** NOESY spectrum of compound **4**;
- Figure S24.** Crystal packing of compound **1** at 297(2) K;
- Figure S25.** Crystal packing of compound **3** at 297(2) K;
- Figure S26.** HPLC analysis of mycelia extract, broth extract, and compounds **1–12** of *Aspergillus versicolor* AS-212;

**Figure S27.** Experimental and calculated ECD spectra of compound **2** at the CAM-B3LYP/TZVP level;

**Table S1.** Crystal data and structure refinement for compounds **1** and **3**;

**Table S2.** Calculated specific rotation values at 589.44 nm for the enantiomers **14R-2** and **14S-2** at the CAM-B3LYP/TZVP level;

**Table S3.**  $^1\text{H}$  and  $^{13}\text{C}$  NMR spectroscopic data for compound **3**.

**Figure S1.** HRESI mass spectrum of compound **1**.

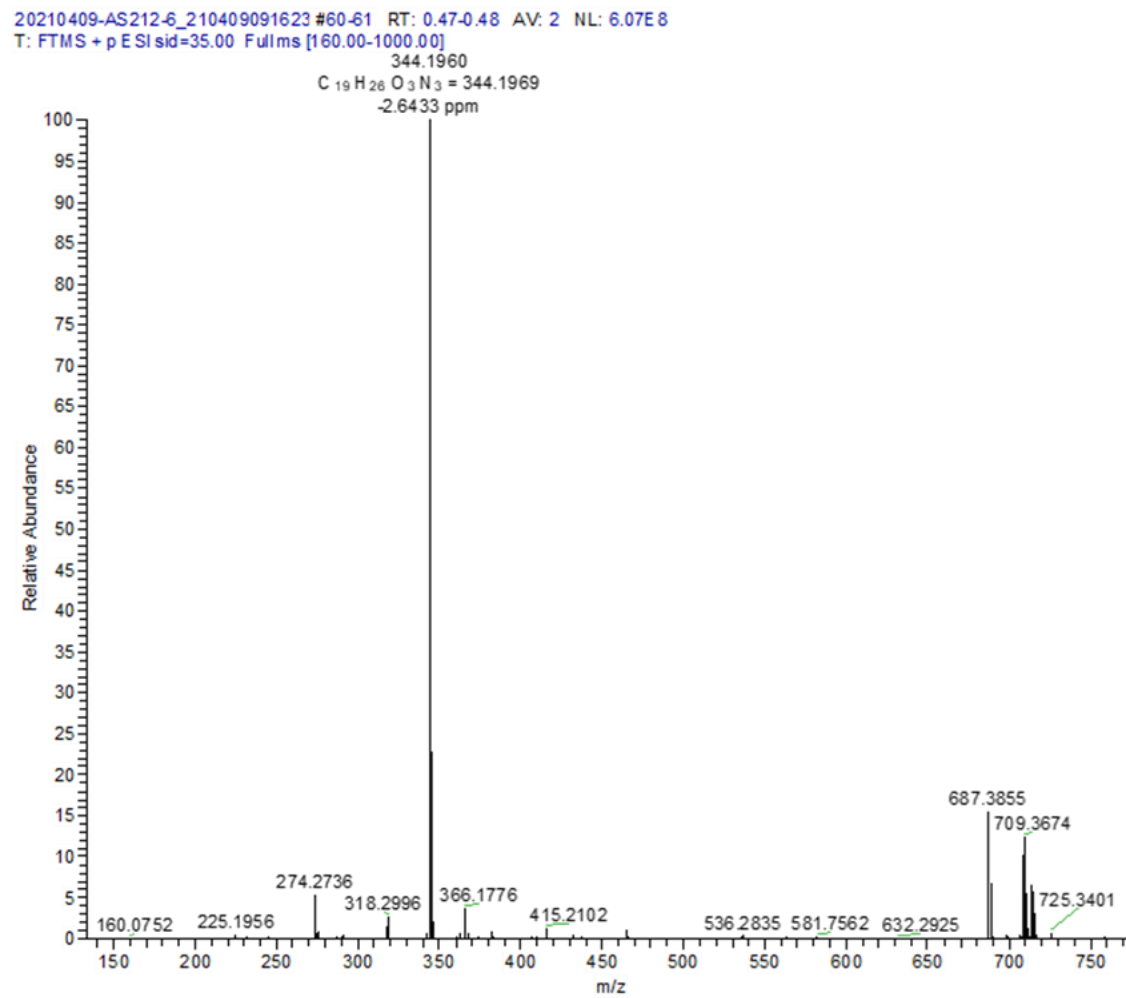

**Figure S2.**  $^1\text{H}$  NMR (500 MHz,  $\text{DMSO}-d_6$ ) spectrum of compound **1**.

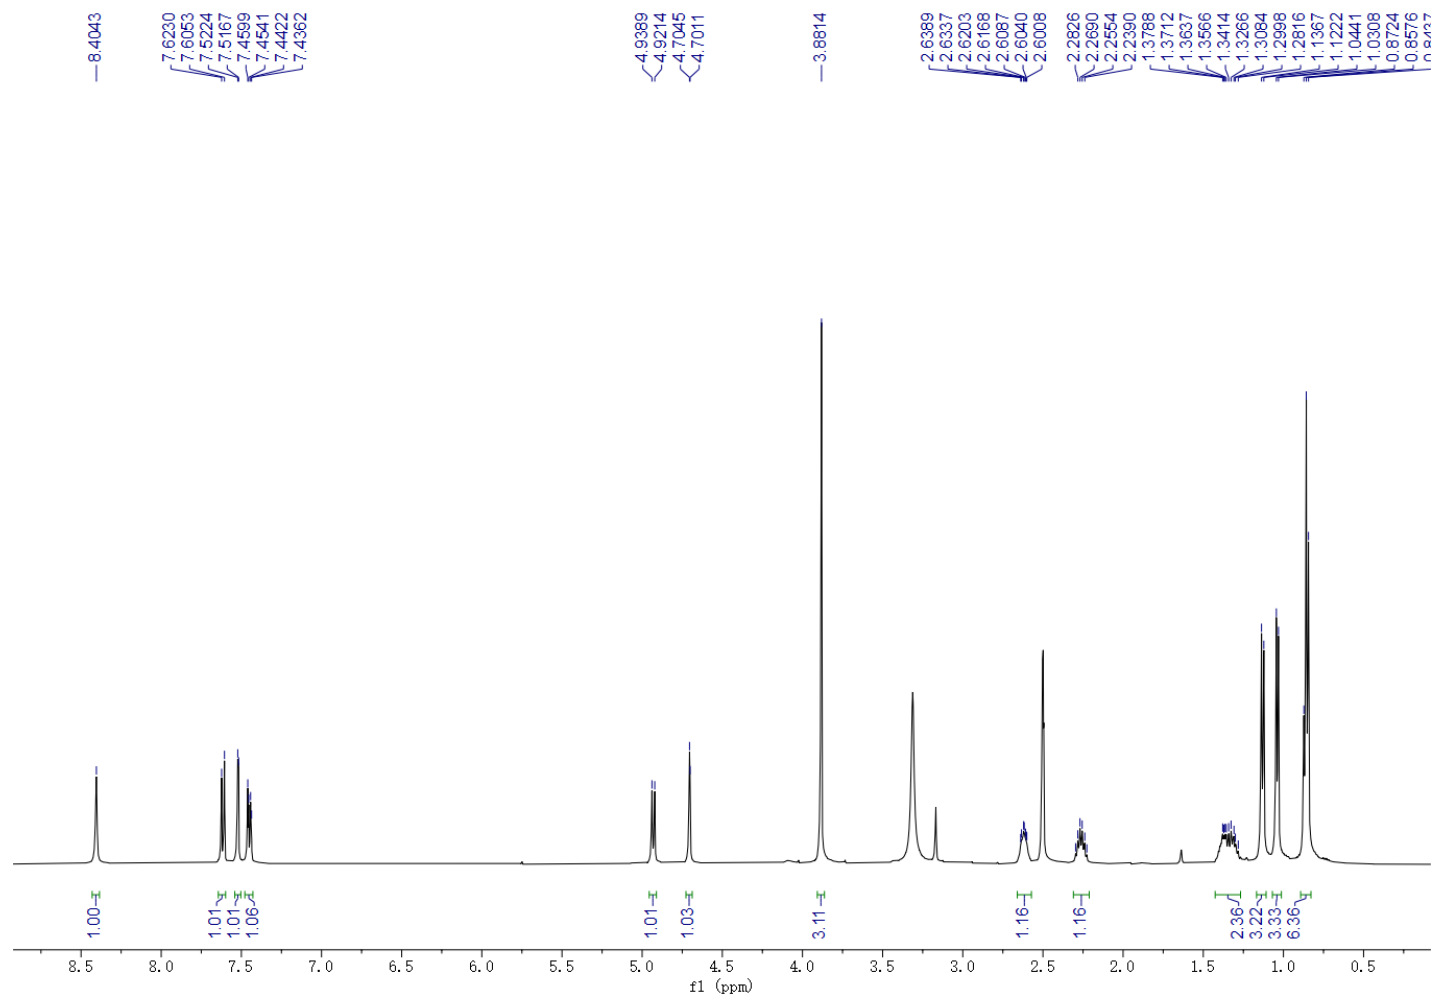

**Figure S3.**  $^{13}\text{C}$  NMR (125 MHz,  $\text{DMSO}-d_6$ ) and DEPT spectra of compound **1**.

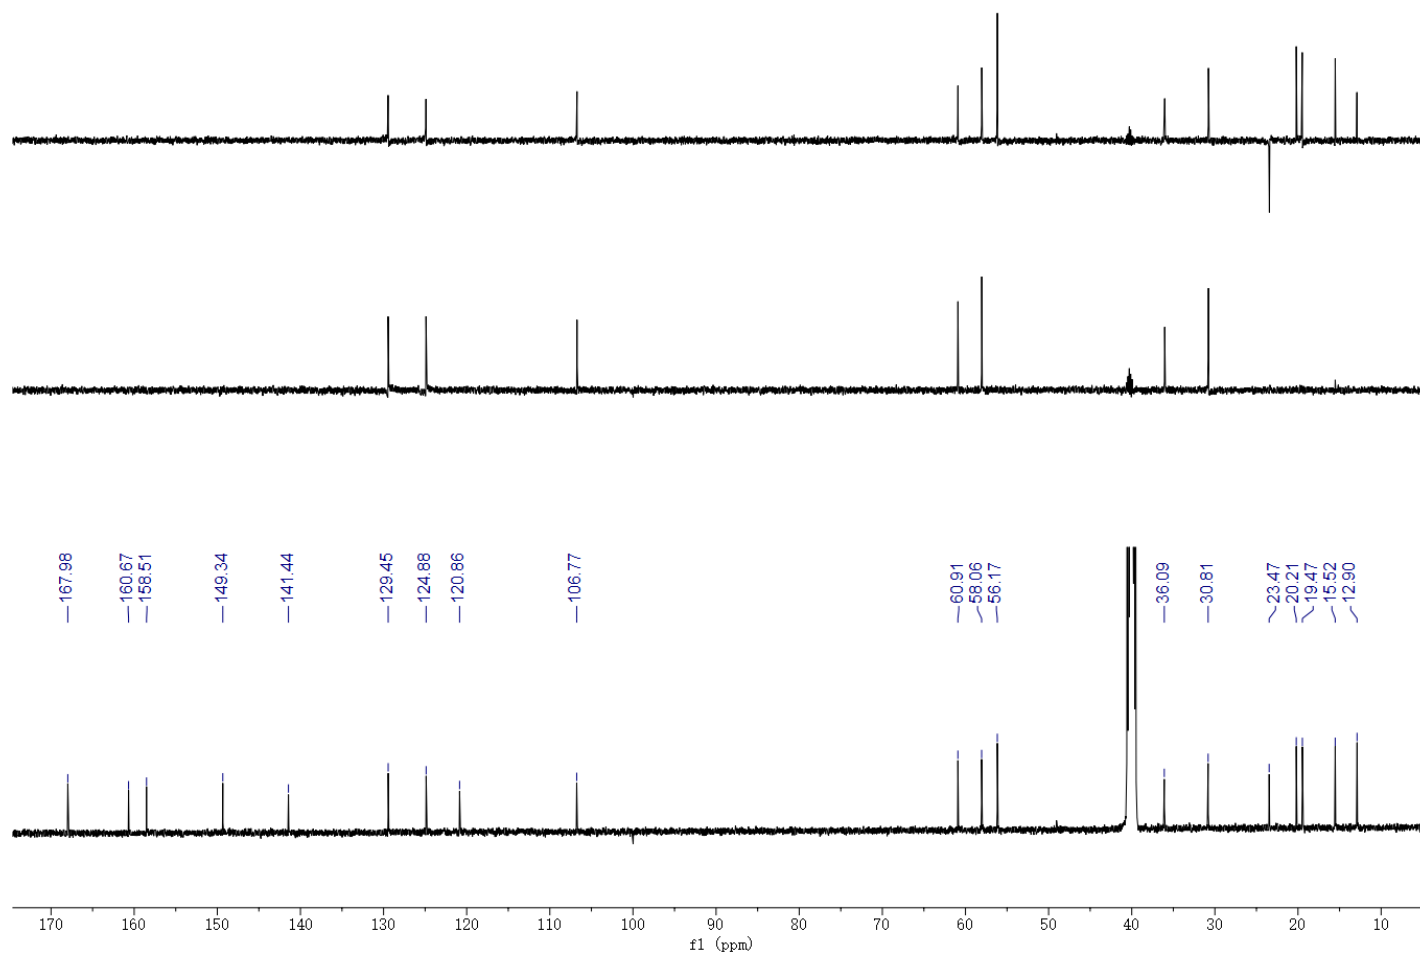

**Figure S4.** COSY spectrum of compound **1**.

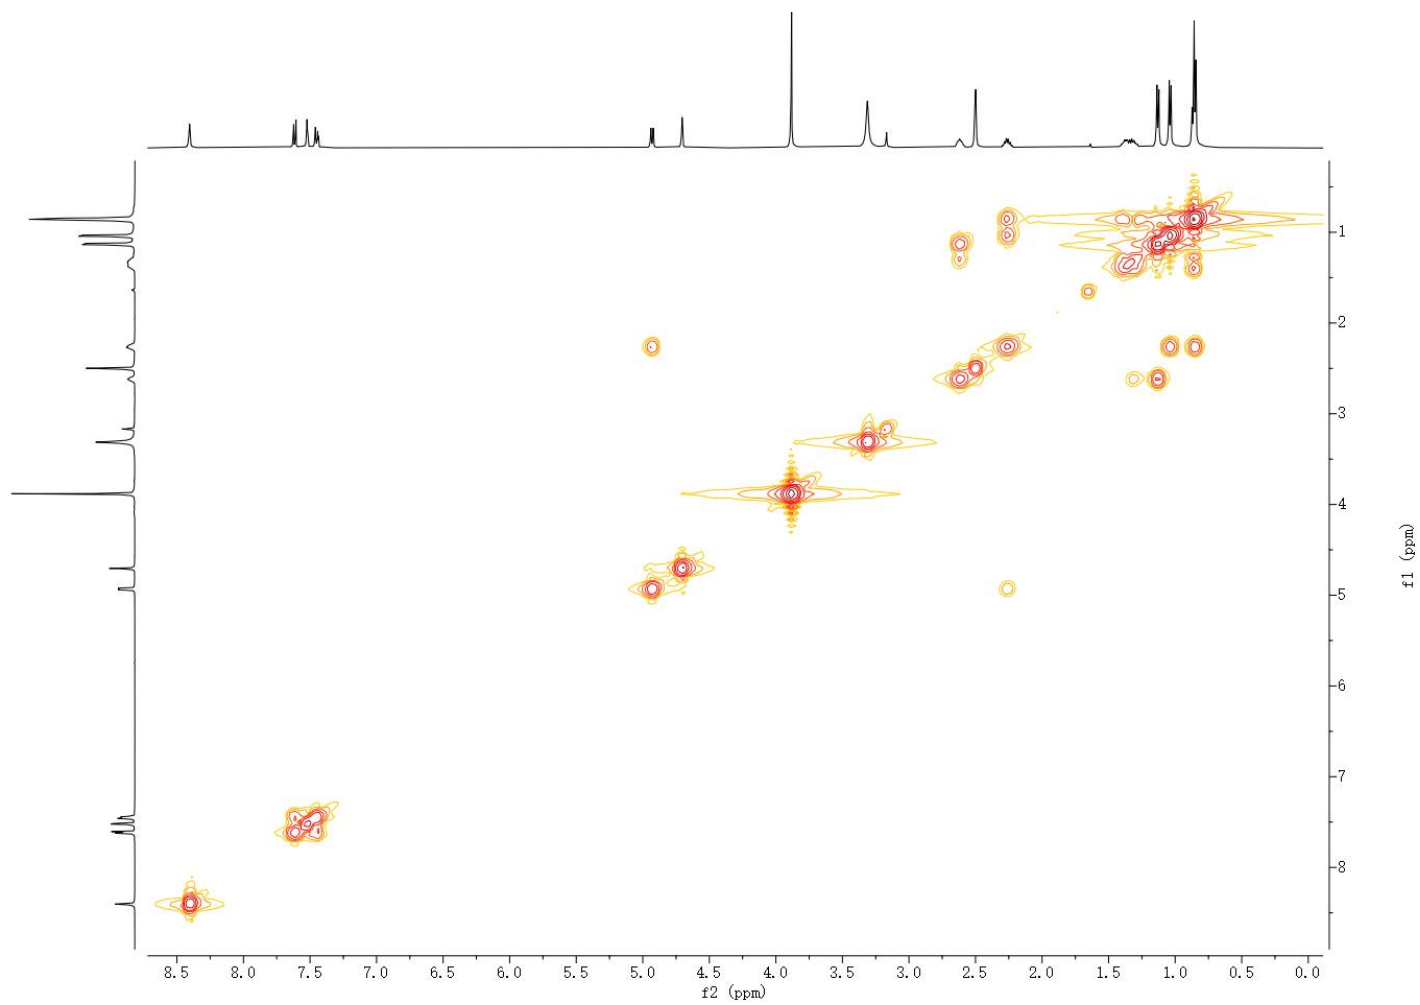

**Figure S5.** HSQC spectrum of compound **1**.

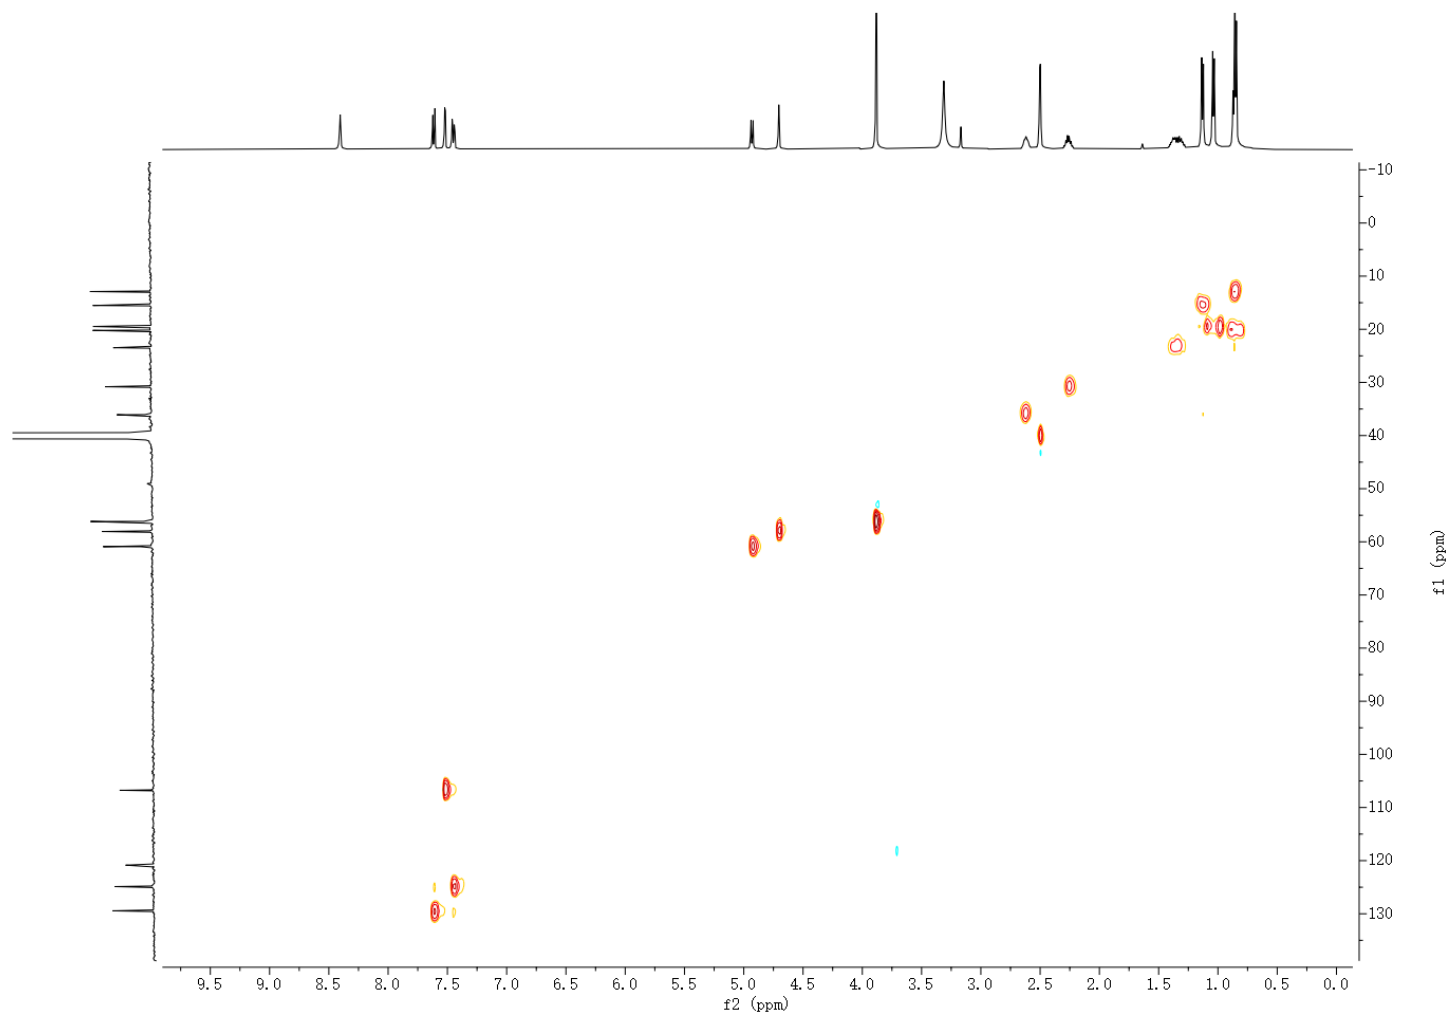

**Figure S6.** HMBC spectrum of compound **1**.

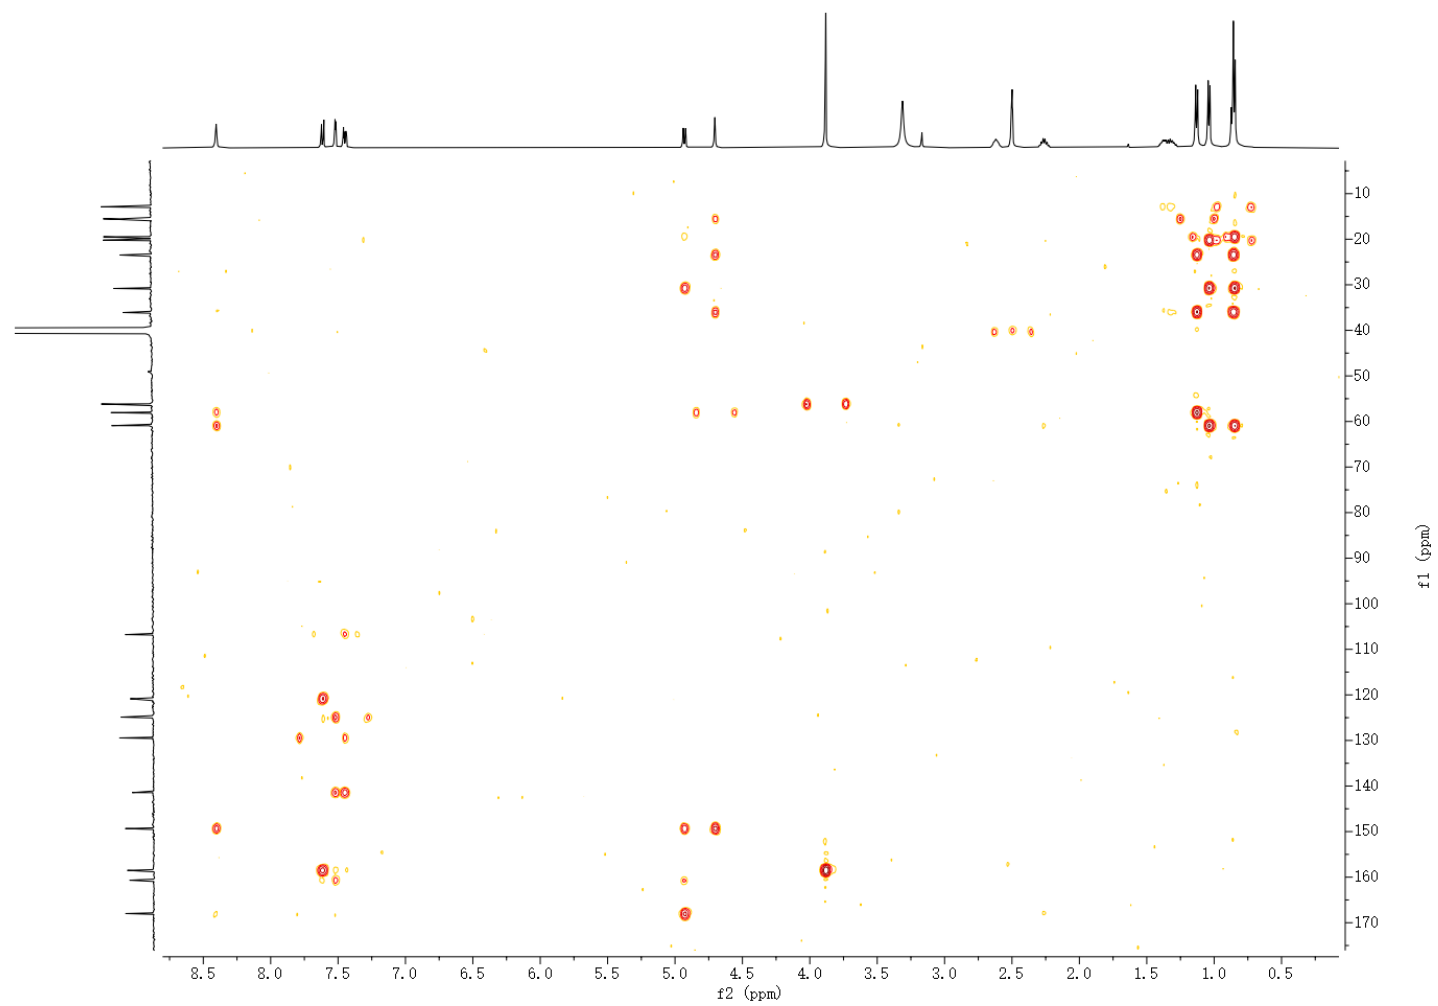



**Figure S7.** NOESY spectrum of compound **1**.

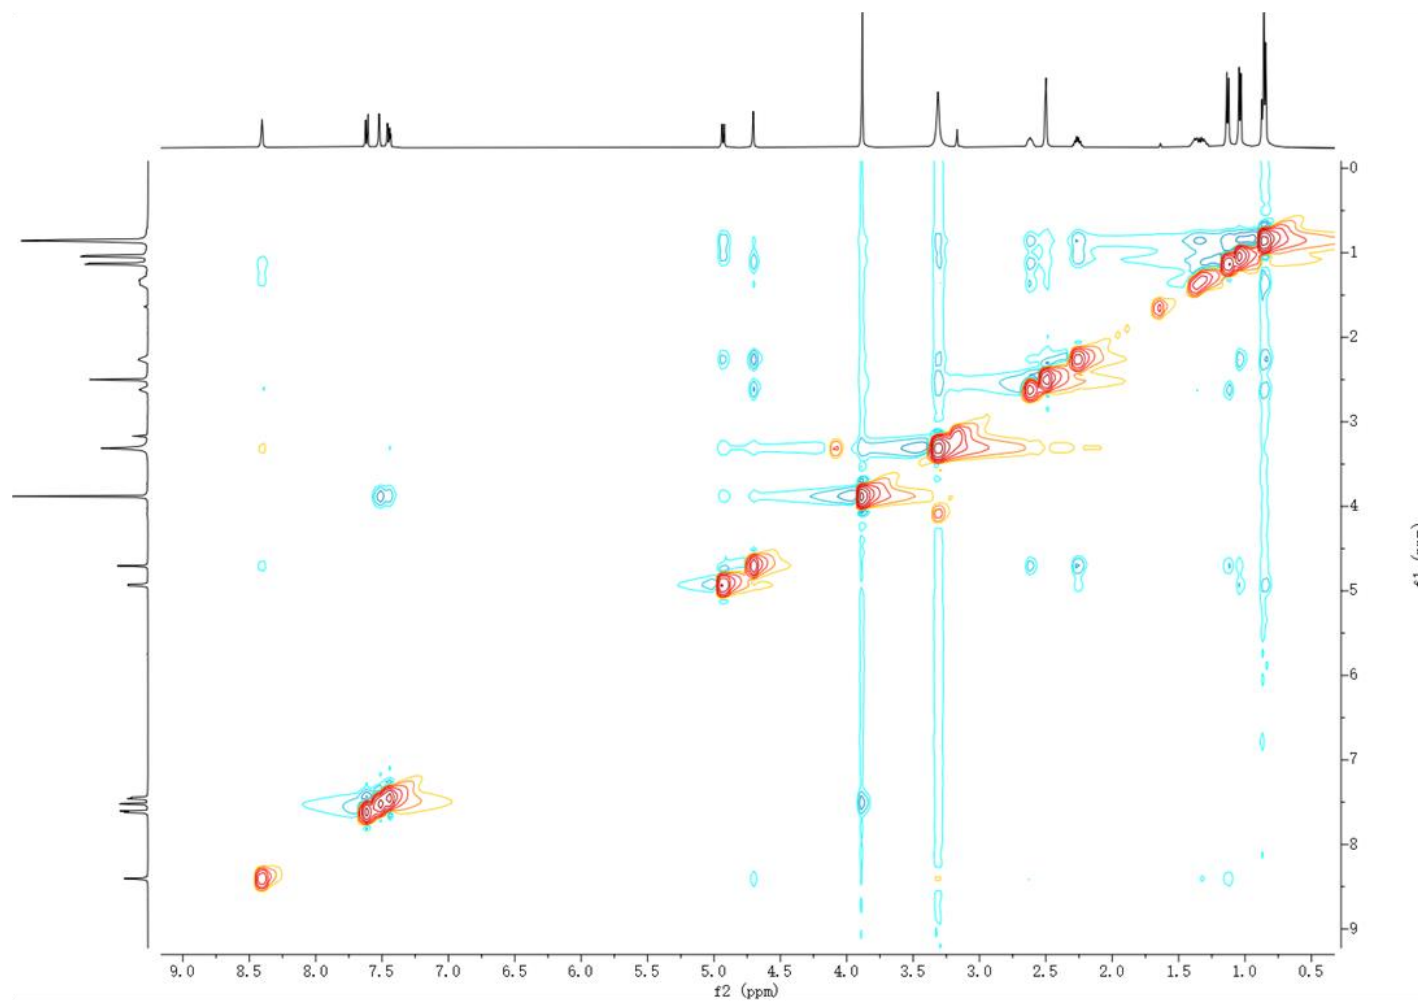

**Figure S8.** HRESI mass spectrum of compound **2**.

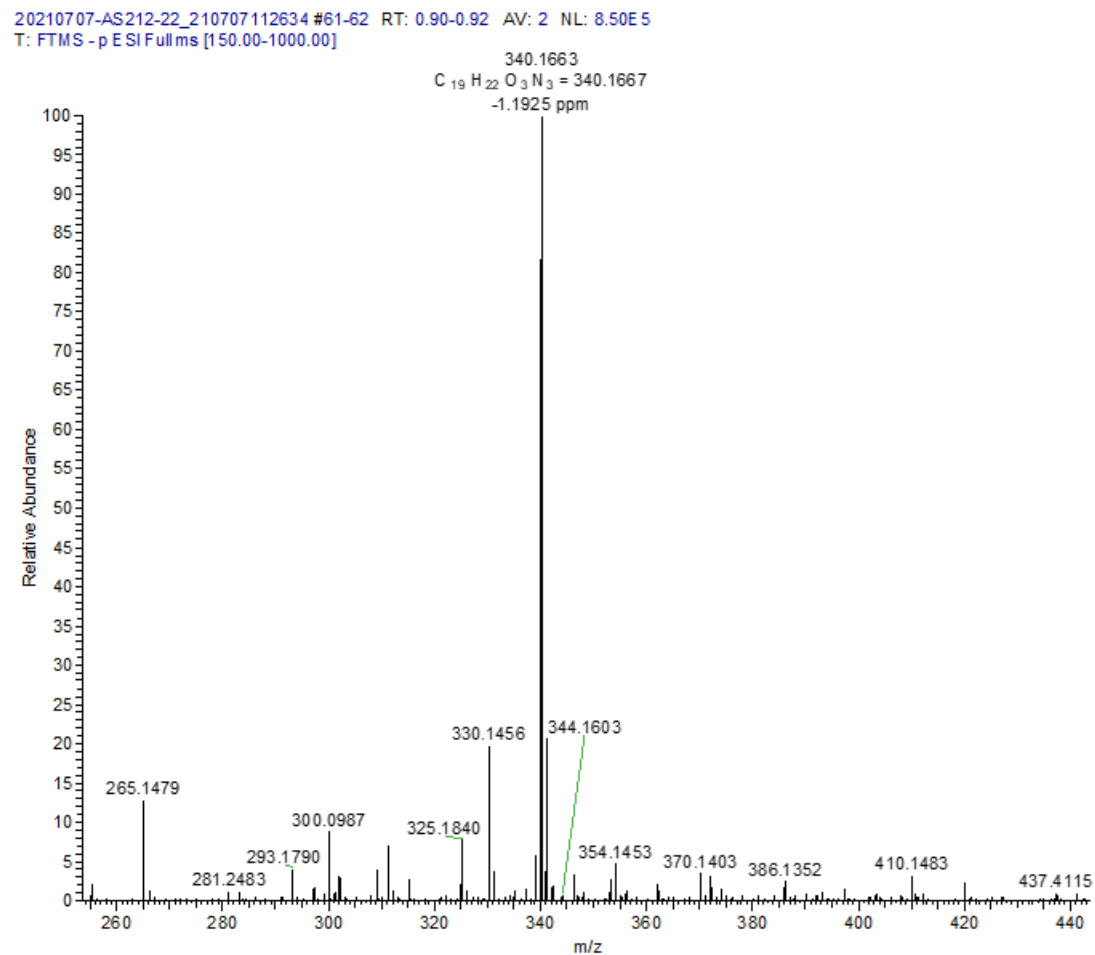

**Figure S9.**  $^1\text{H}$  NMR (500 MHz,  $\text{CDCl}_3$ ) spectrum of compound **2**.

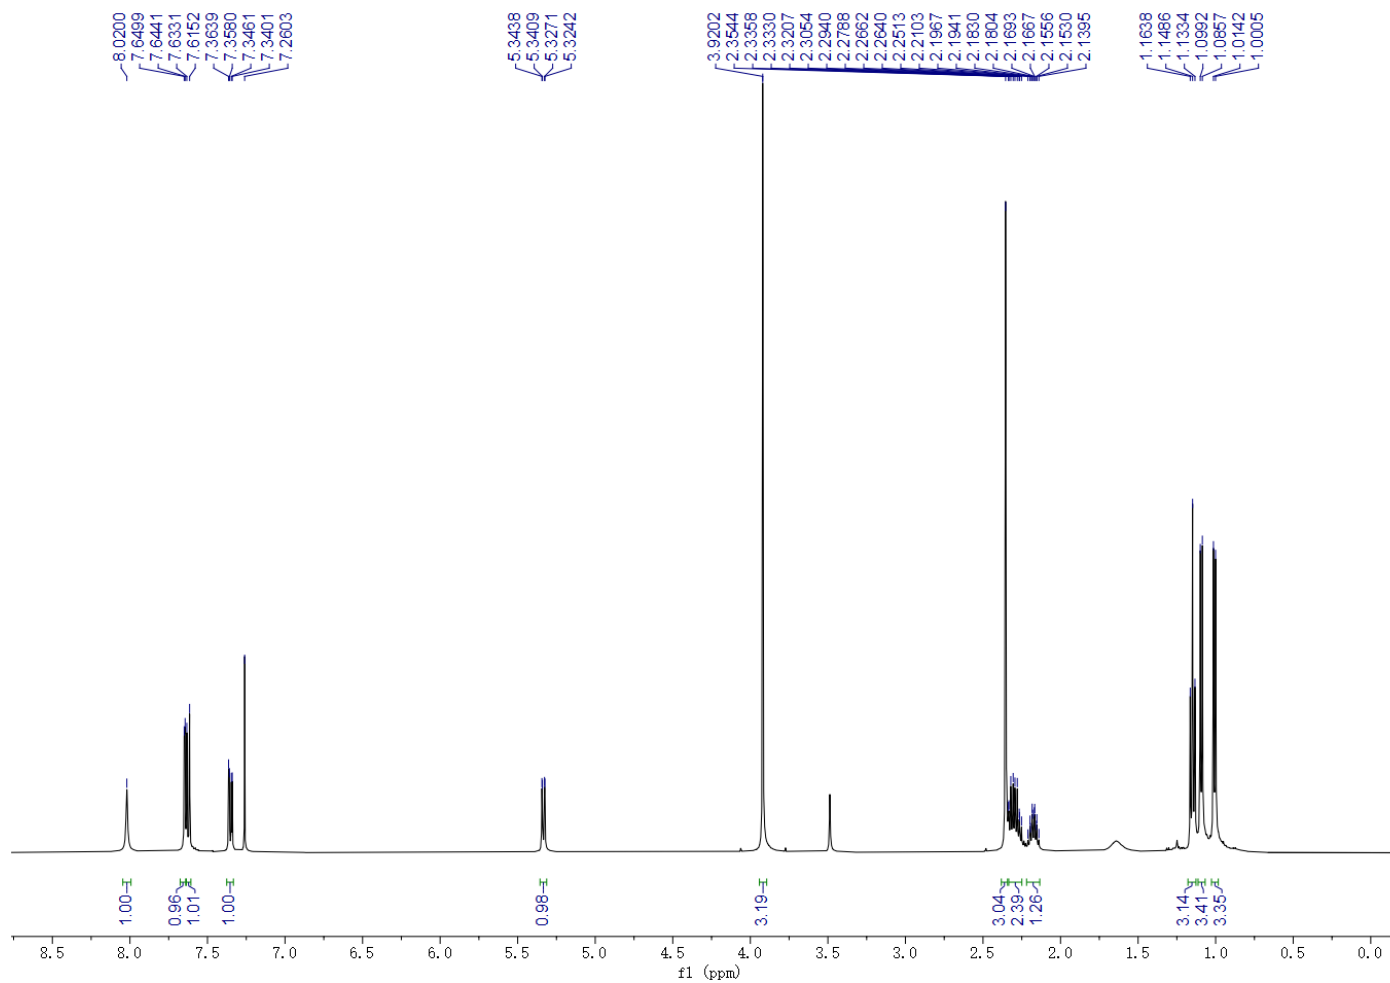

**Figure S10.**  $^{13}\text{C}$  NMR (125 MHz,  $\text{CDCl}_3$ ) and DEPT spectra of compound **2**.

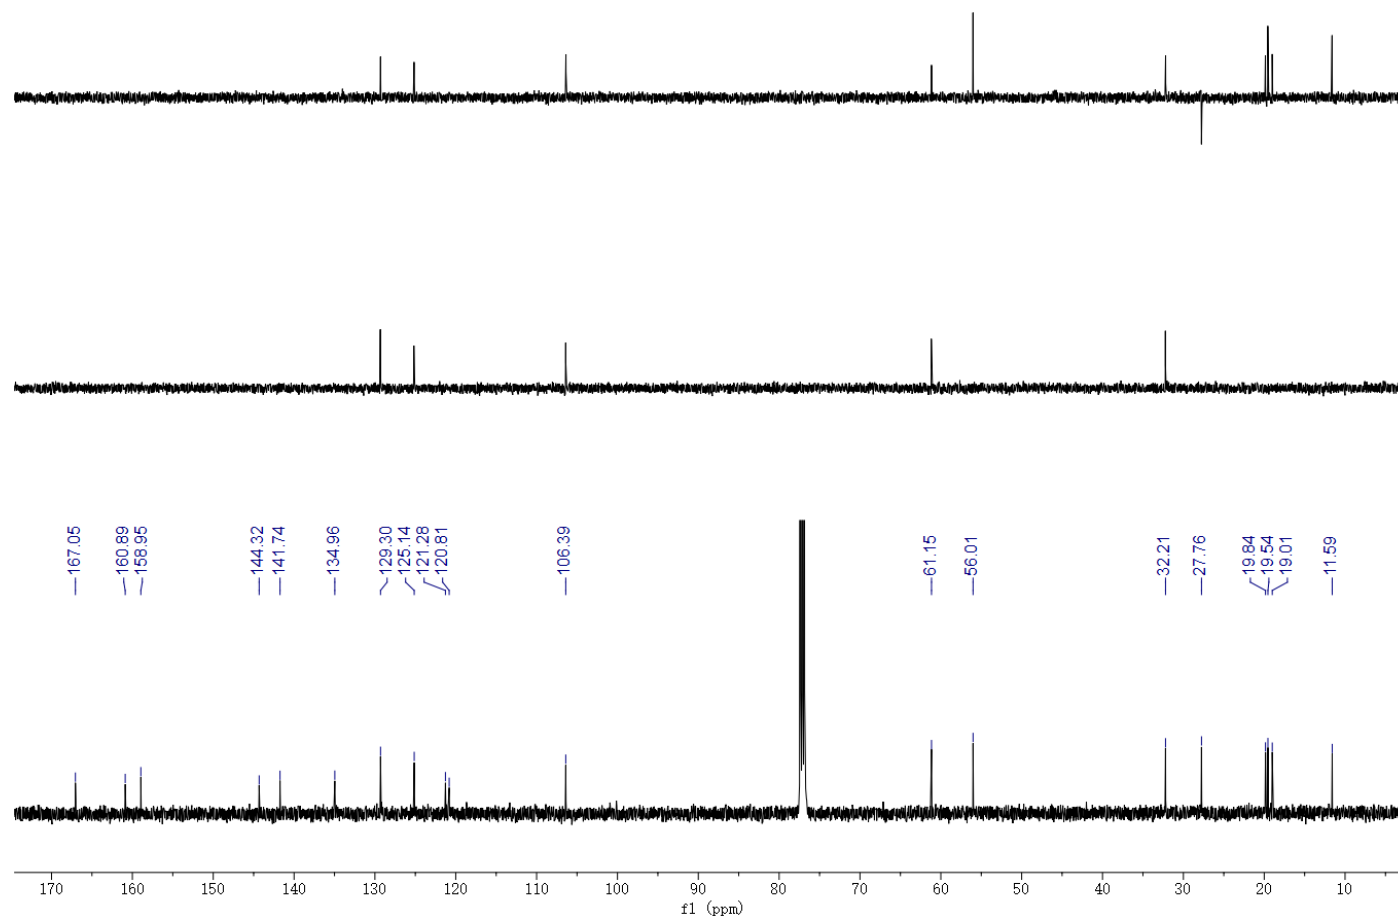

**Figure S11.** COSY spectrum of compound **2**.

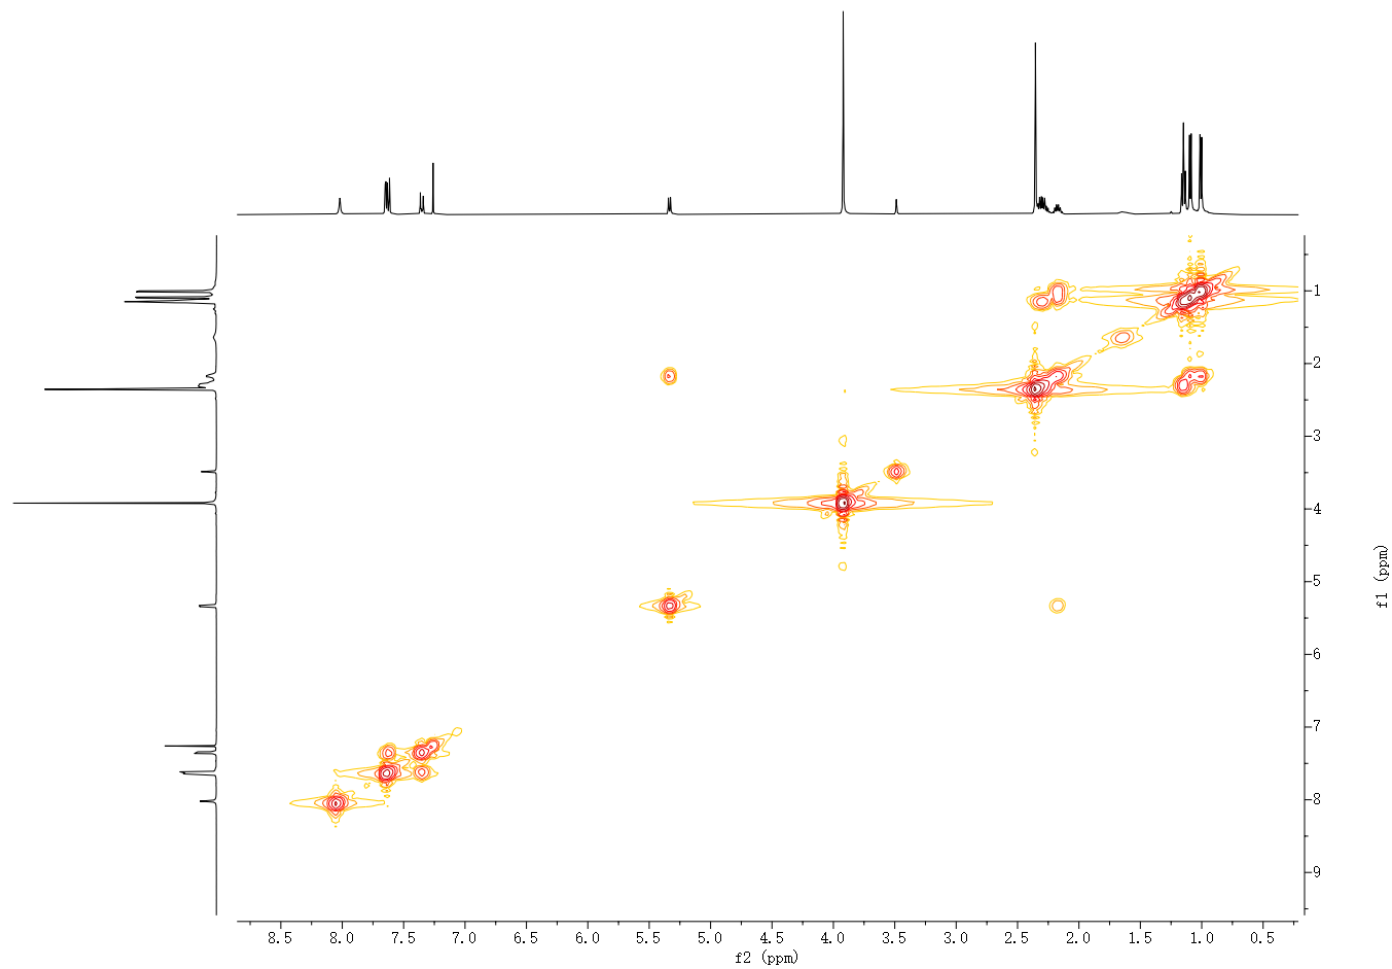

**Figure S12.** HSQC spectrum of compound **2**.

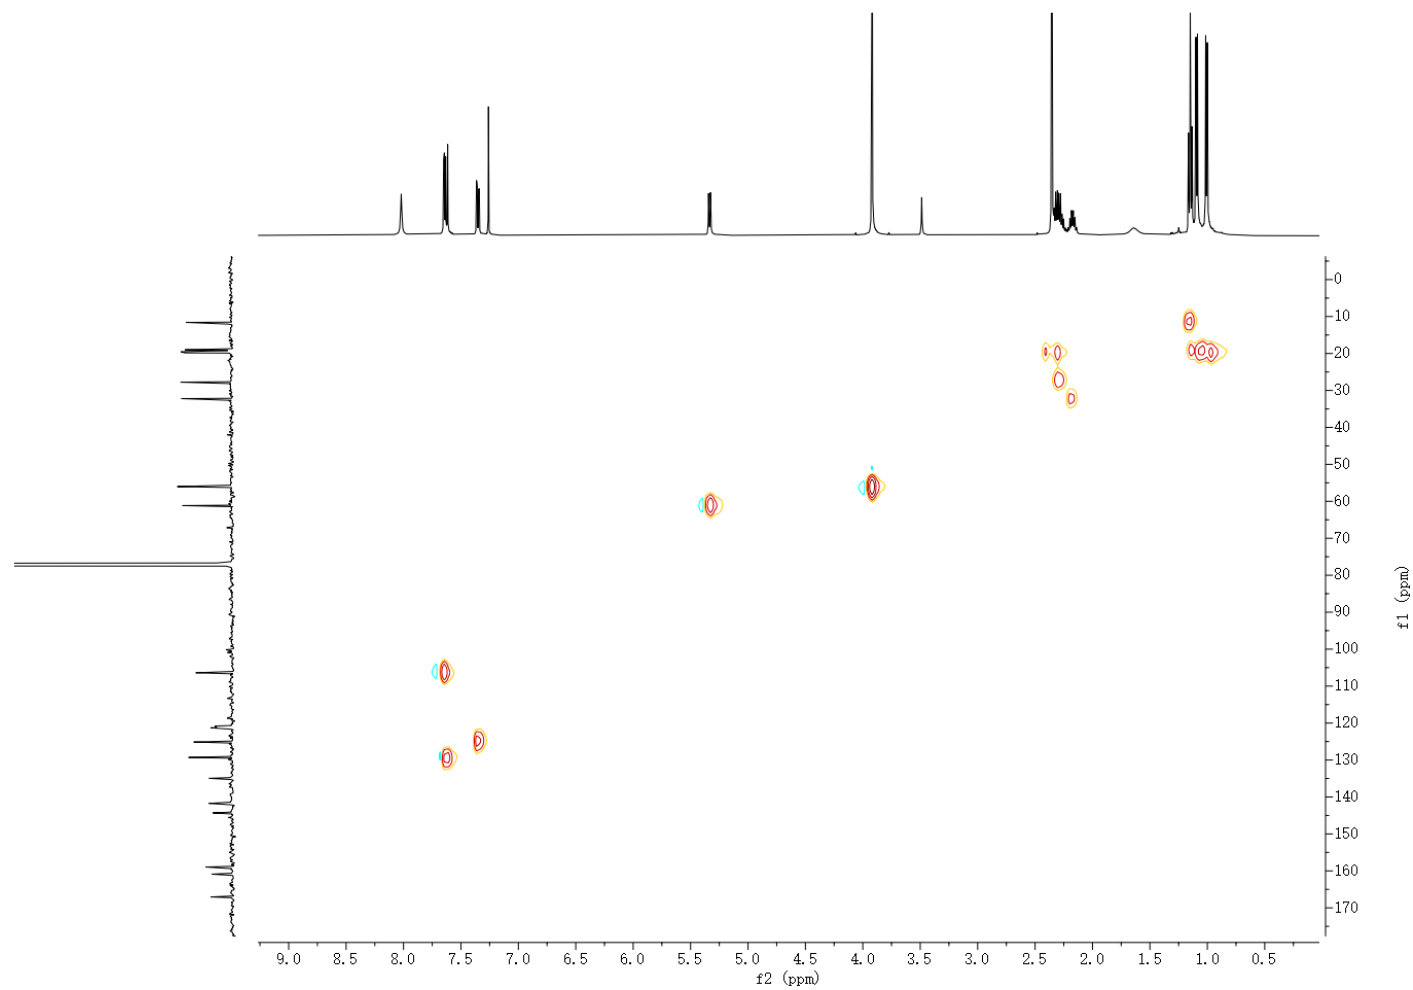

**Figure S13.** HMBC spectrum of compound **2**.

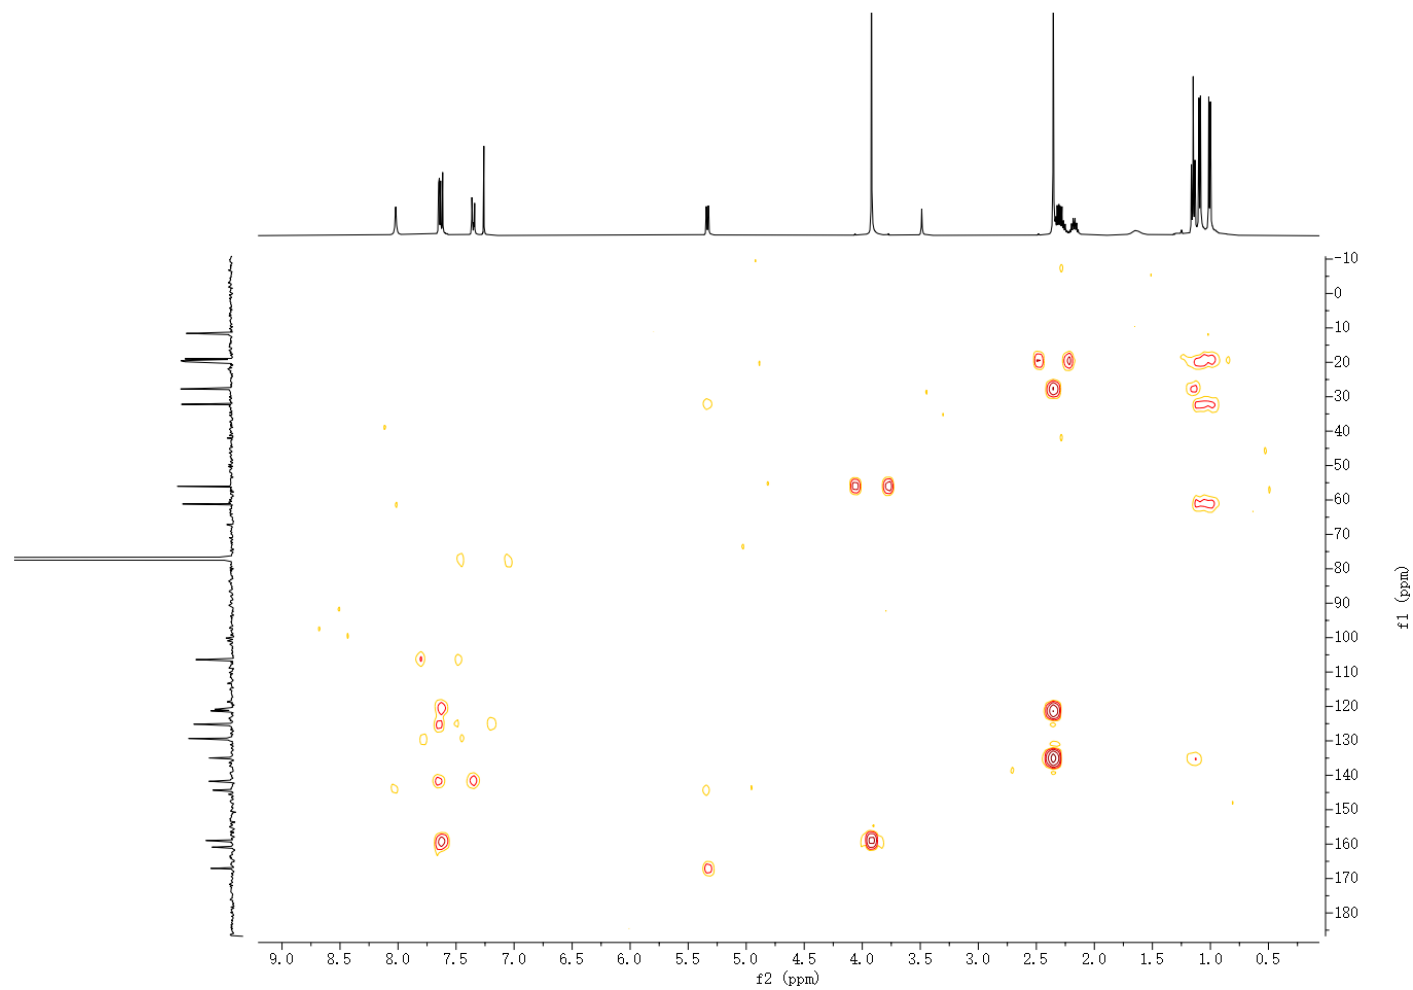

**Figure S14.** NOESY spectrum of compound **2**.

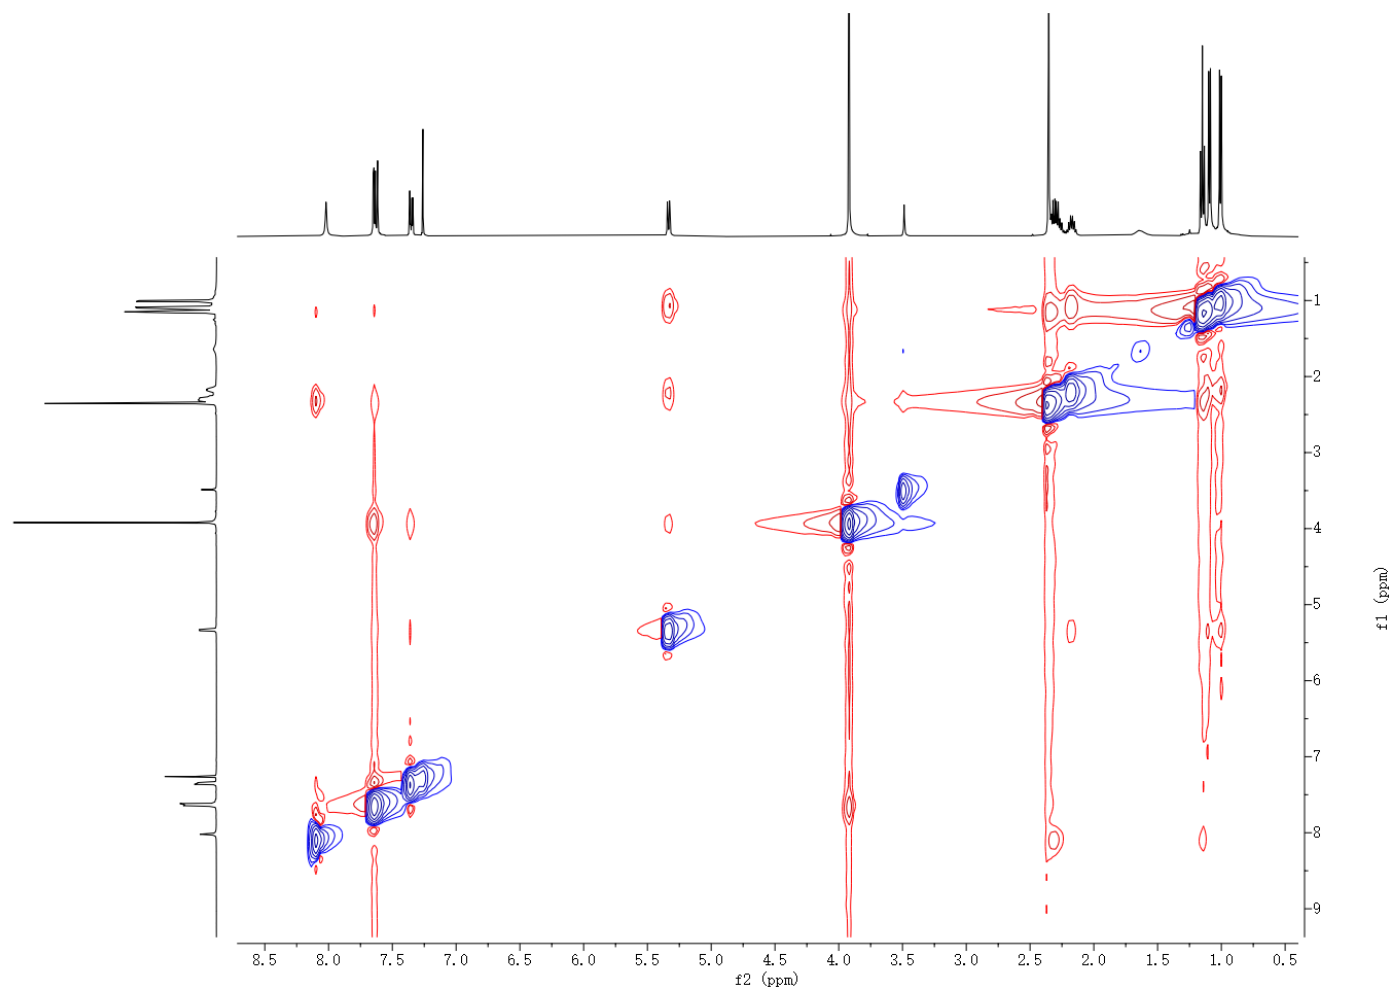



**Figure S15.**  $^1\text{H}$  NMR (500 MHz,  $\text{DMSO}-d_6$ ) spectrum of compound **3**.

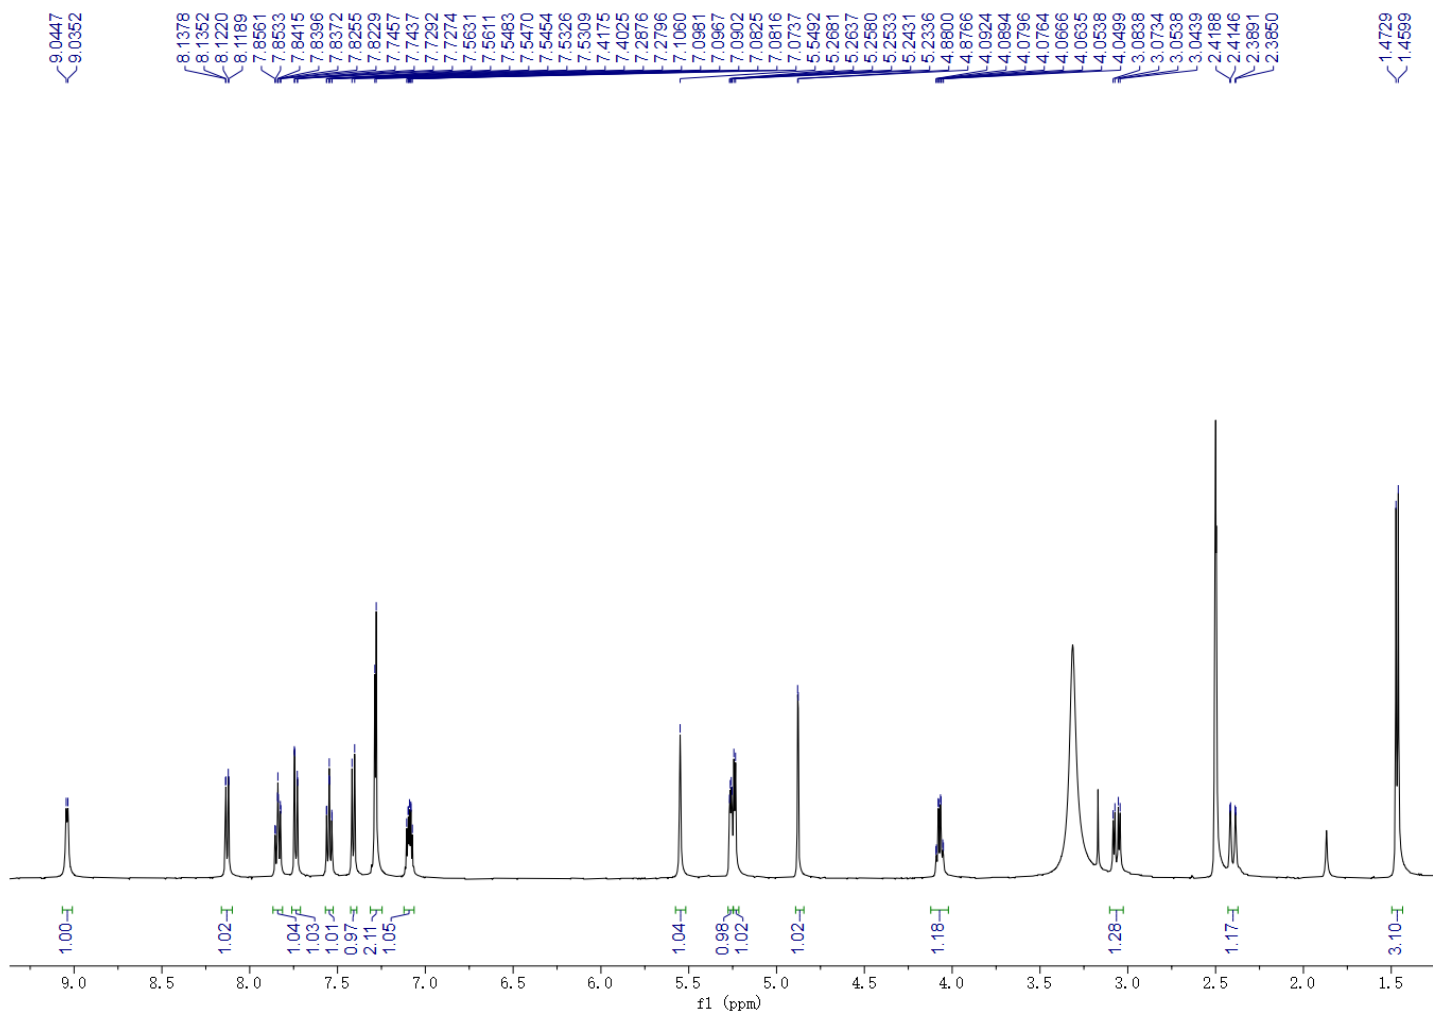

**Figure S16.**  $^{13}\text{C}$  NMR (125 MHz,  $\text{DMSO-}d_6$ ) and DEPT spectra of compound **3**.

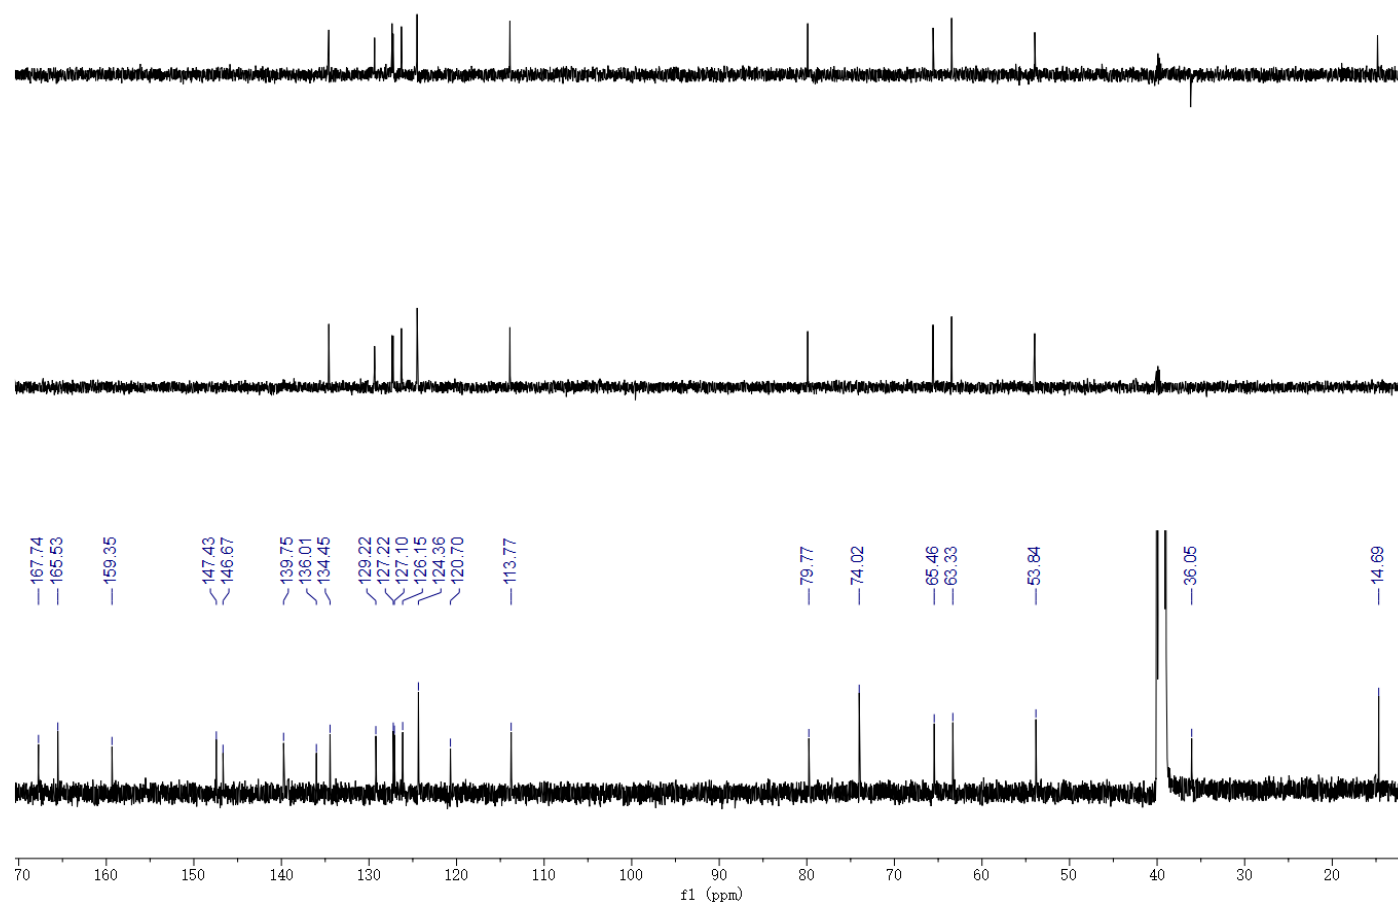

**Figure S17.** HRESI mass spectrum of compound **4**.

20210927-AS212-46\_210927082648 #30-35 RT: 0.25-0.29 AV: 6 NL: 1.19E6  
T: FTMS + p ESI Full ms [150.00-1500.00]

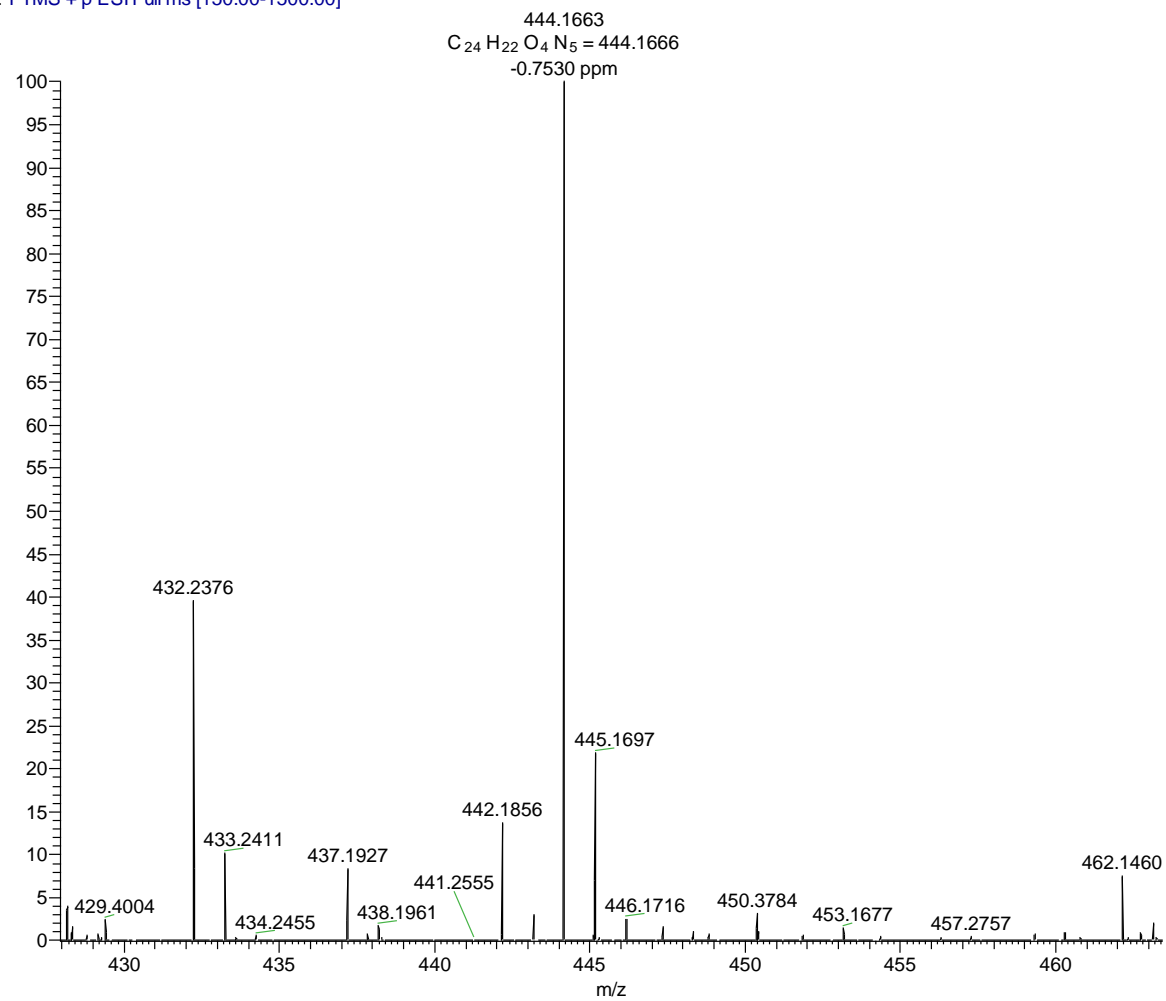

**Figure S18.**  $^1\text{H}$  NMR (500 MHz,  $\text{DMSO}-d_6$ ) spectrum of compound **4**.

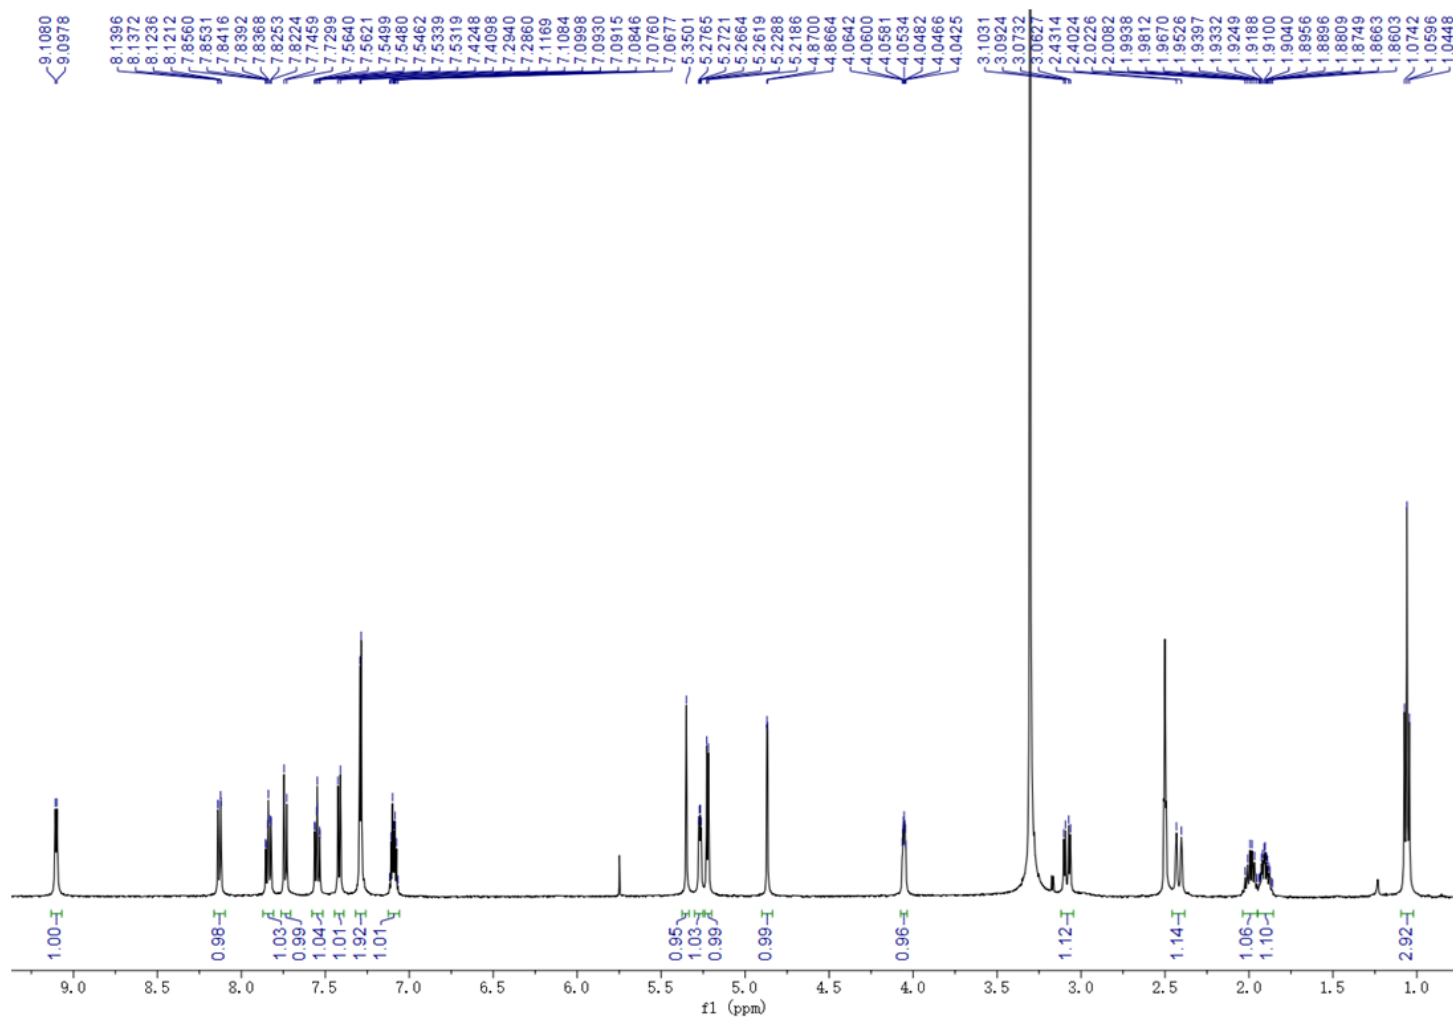

**Figure S19.**  $^{13}\text{C}$  NMR (125 MHz,  $\text{DMSO-}d_6$ ) and DEPT spectra of compound **4**.

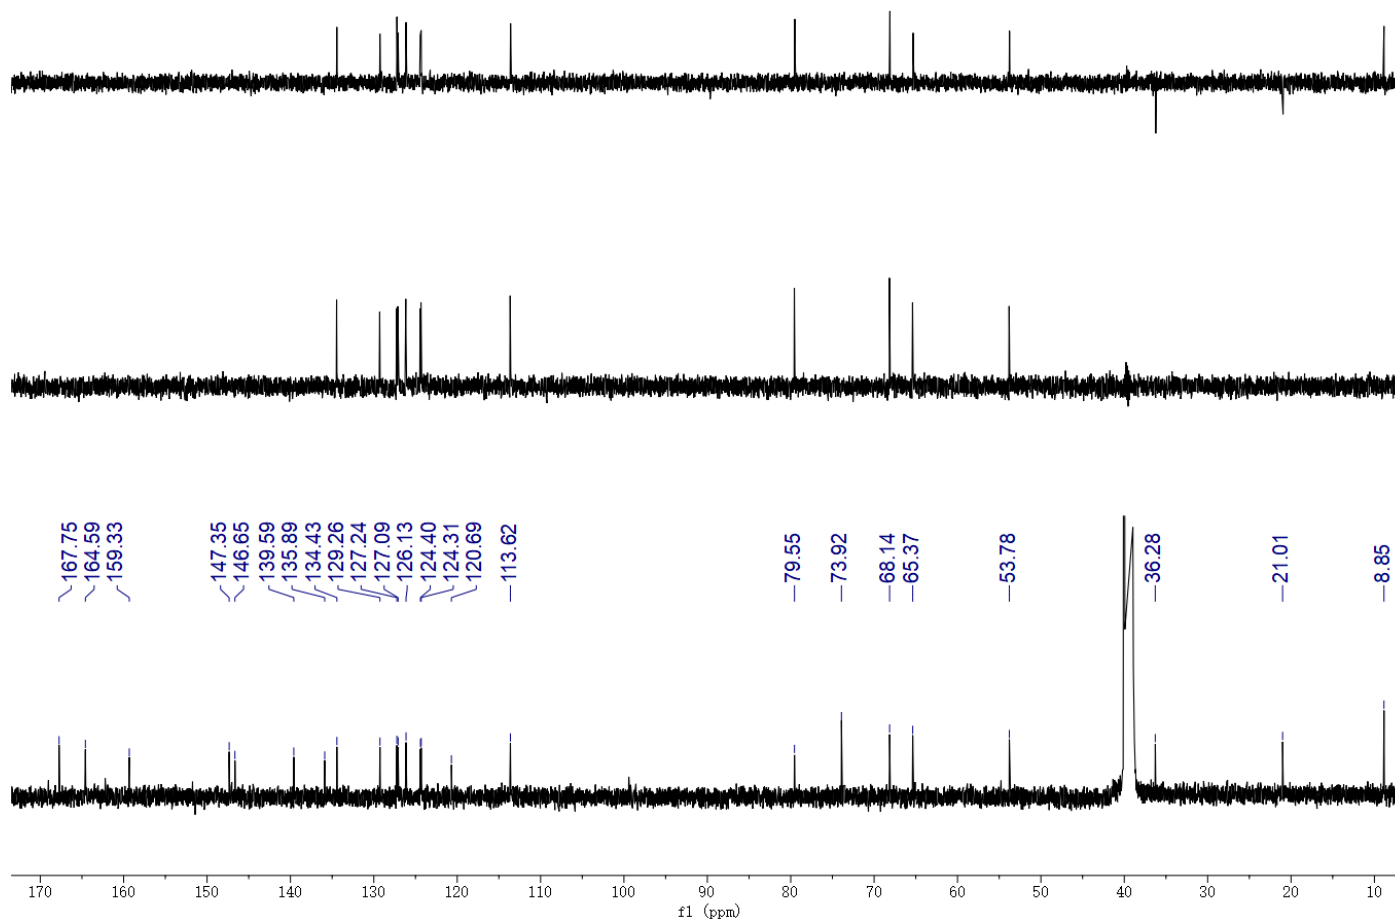

**Figure S20.** COSY spectrum of compound **4**.

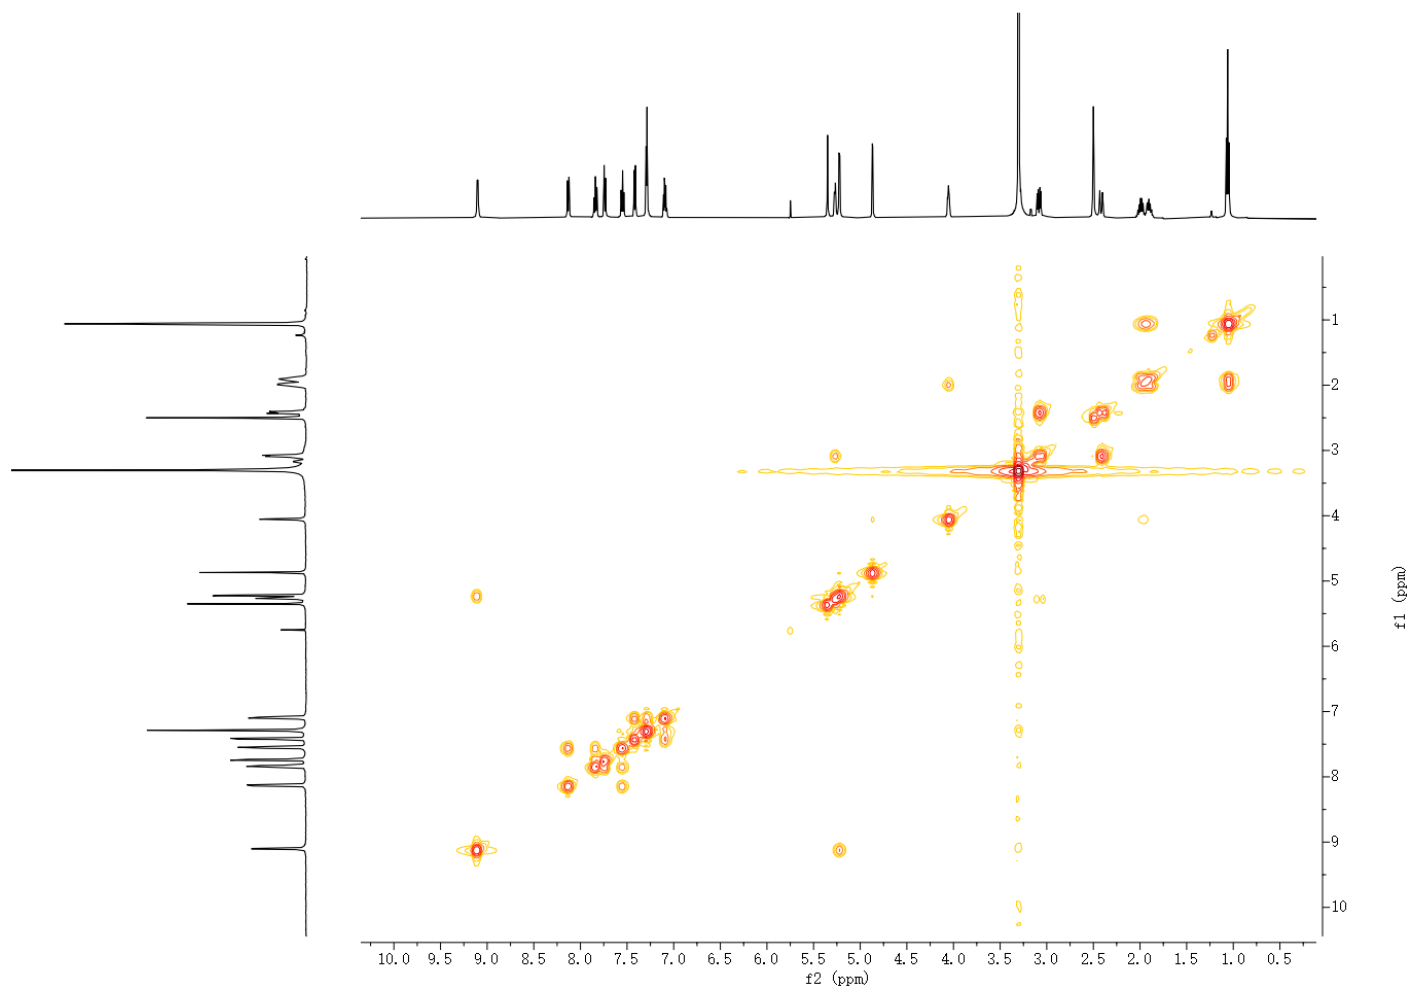

**Figure S21.** HSQC spectrum of compound **4**.

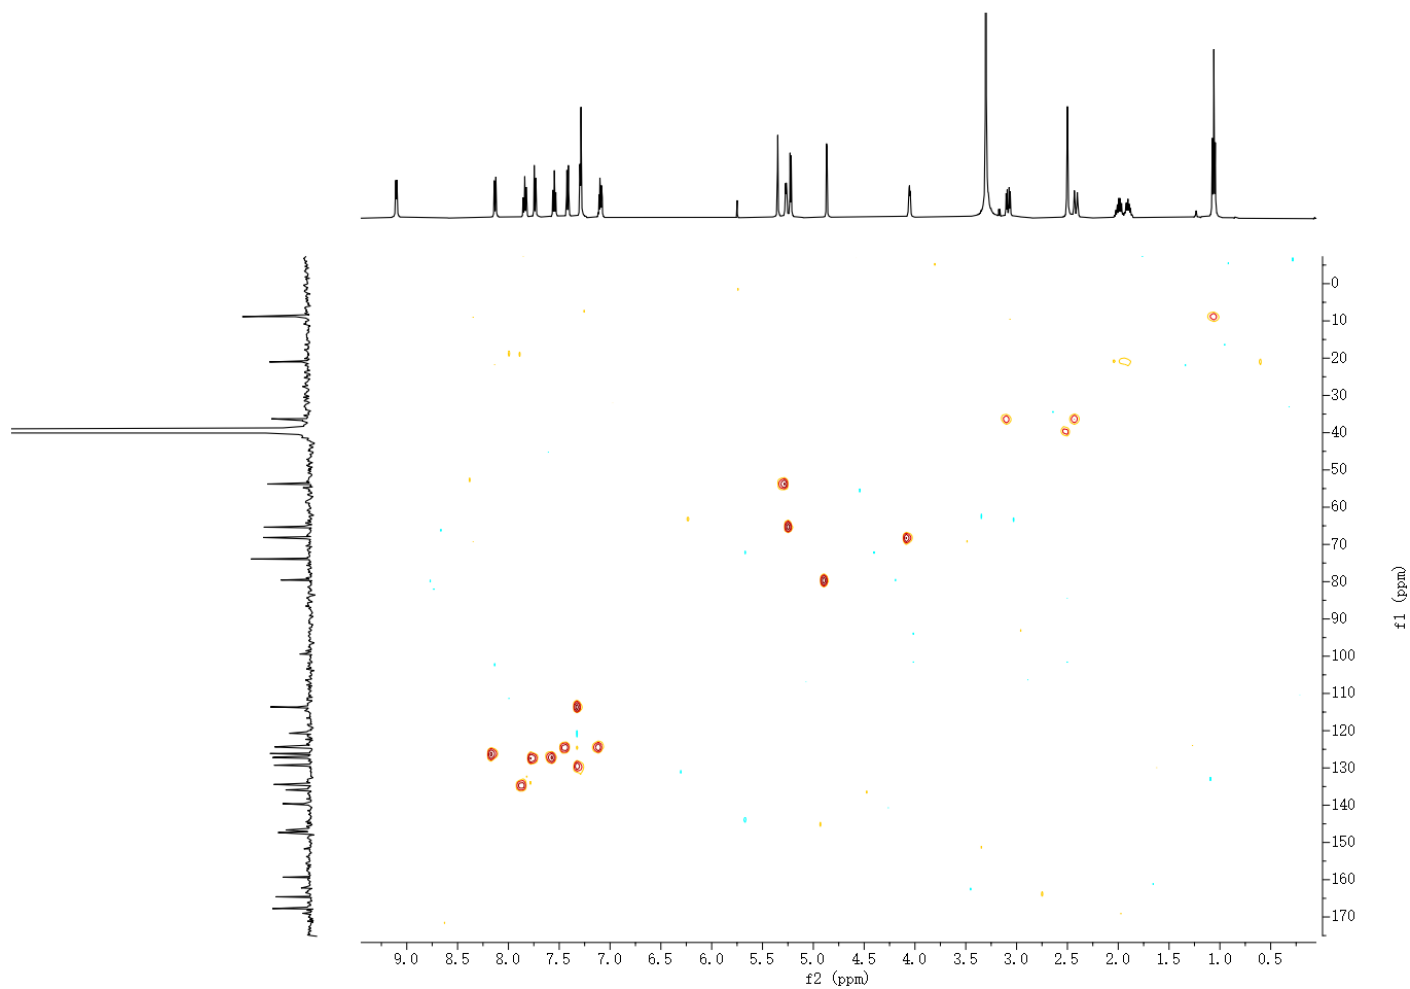

**Figure S22.** HMBC spectrum of compound **4**.

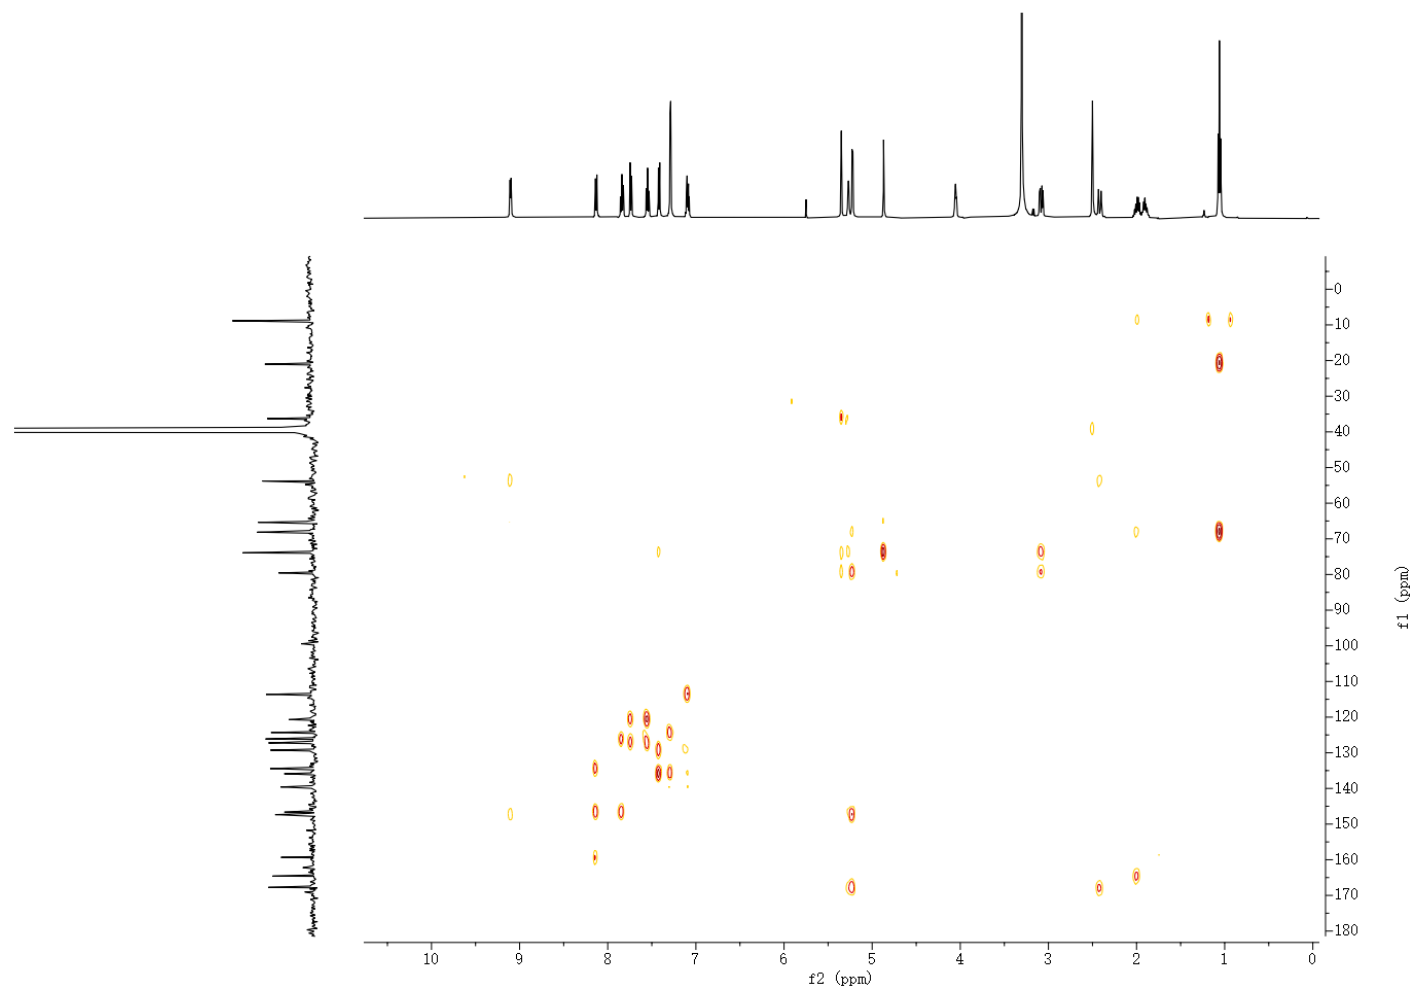



**Figure S23.** NOESY spectrum of compound **4**.

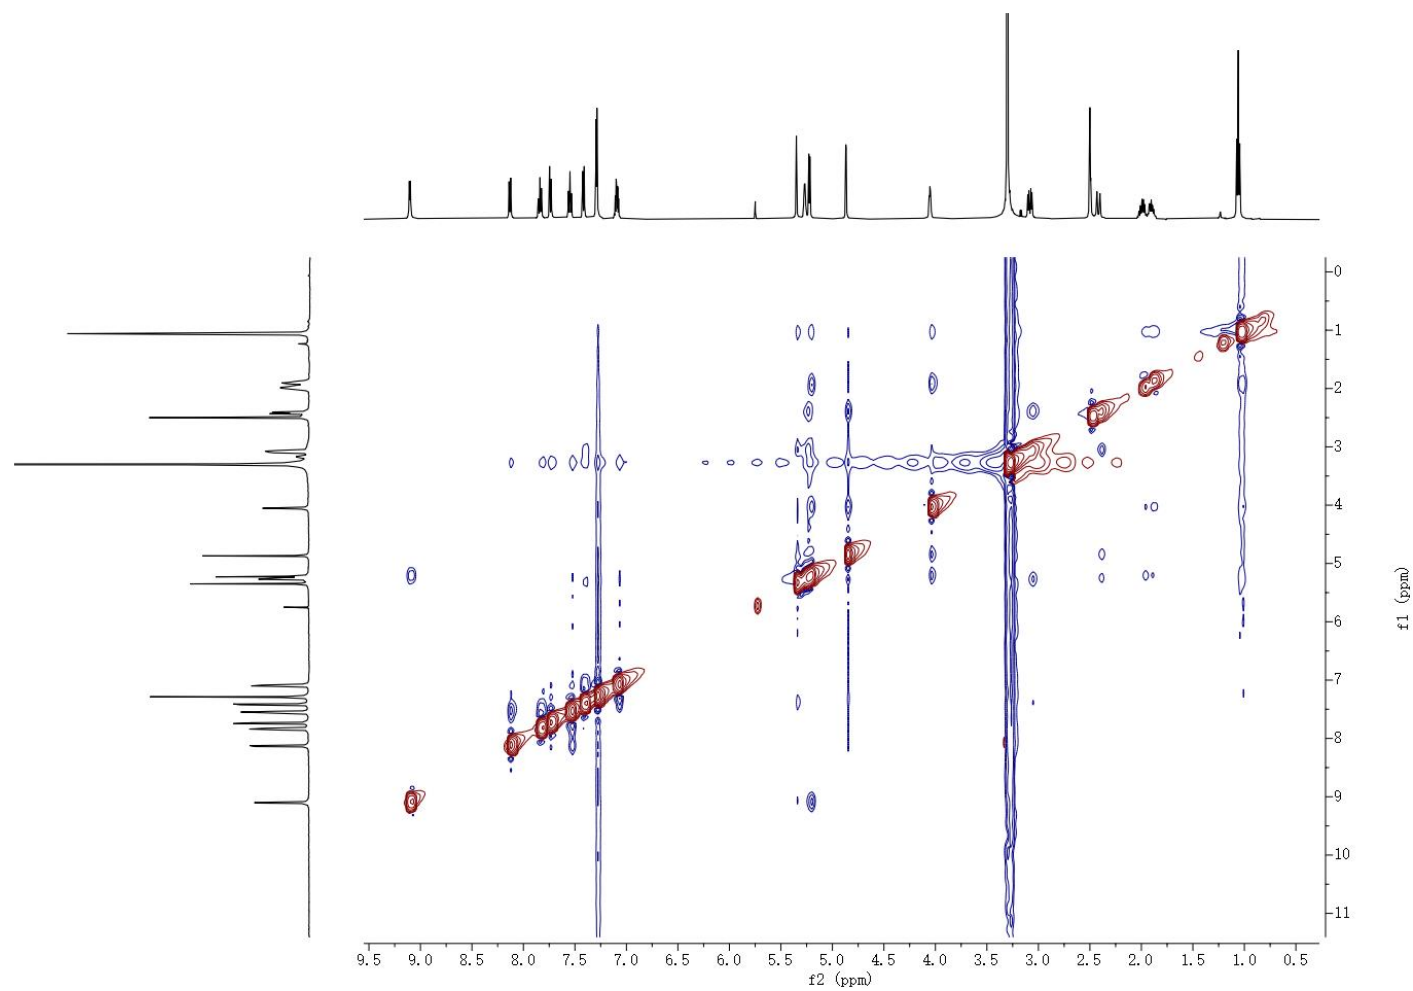

**Figure S24.** Crystal packing of compound **1** at 297(2) K.

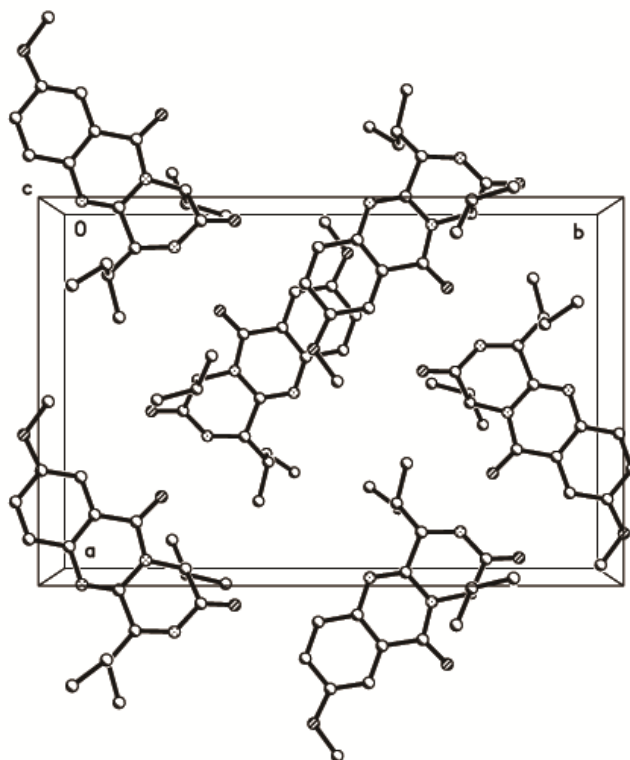

**Figure S25.** Crystal packing of compound **3** at 297(2) K.

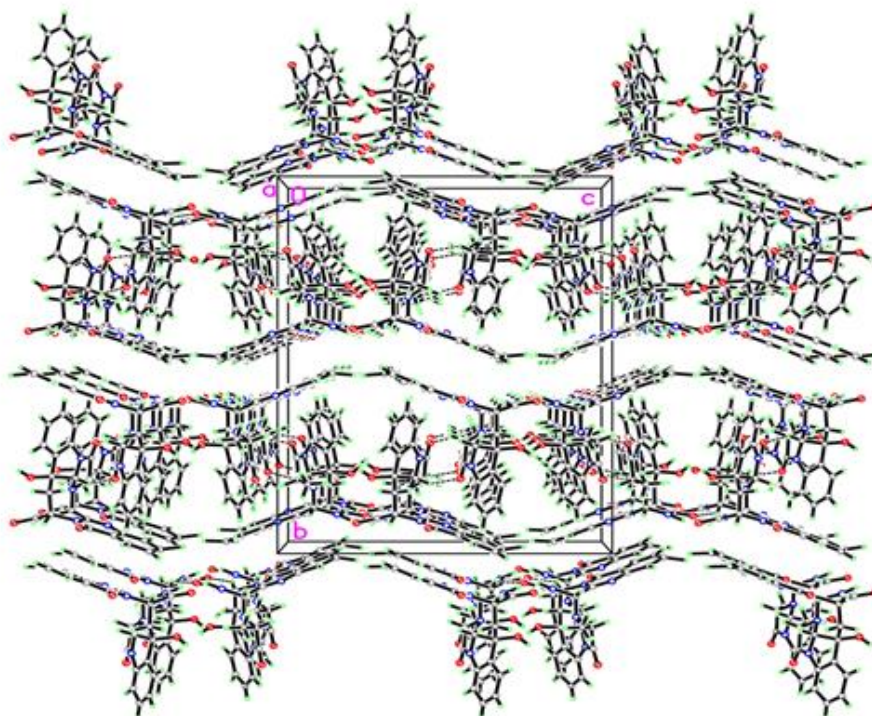

**Figure S26.** HPLC analysis of mycelia extract, broth extract, and compounds **1–12** of *Aspergillus versicolor* AS-212.

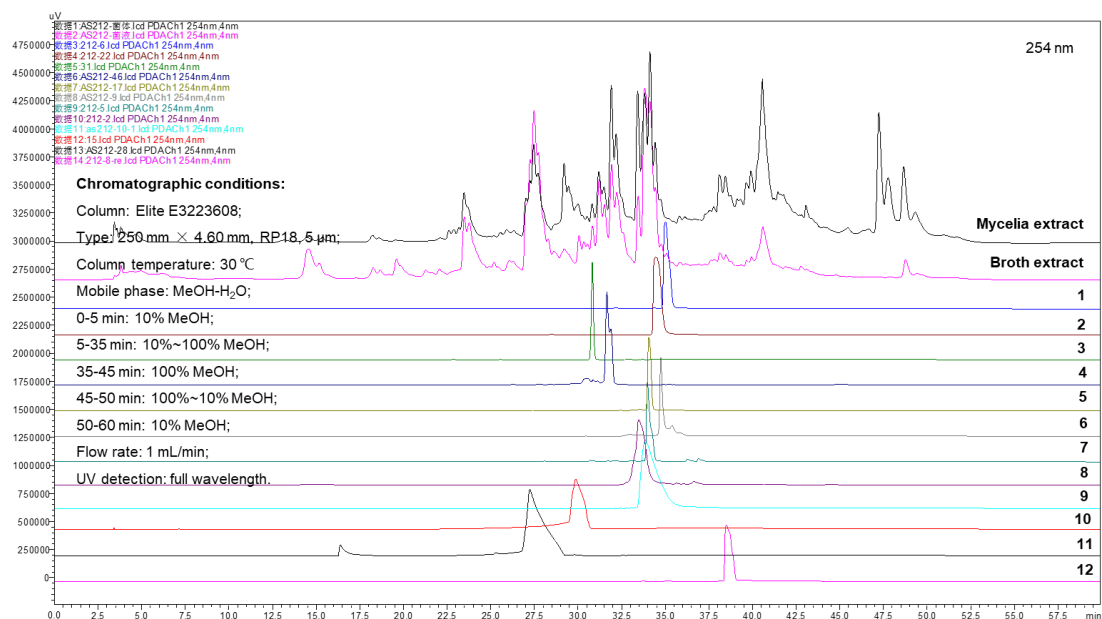

**Figure S27.** Experimental and calculated ECD spectra of compound **2** at the CAM-B3LYP/TZVP level.

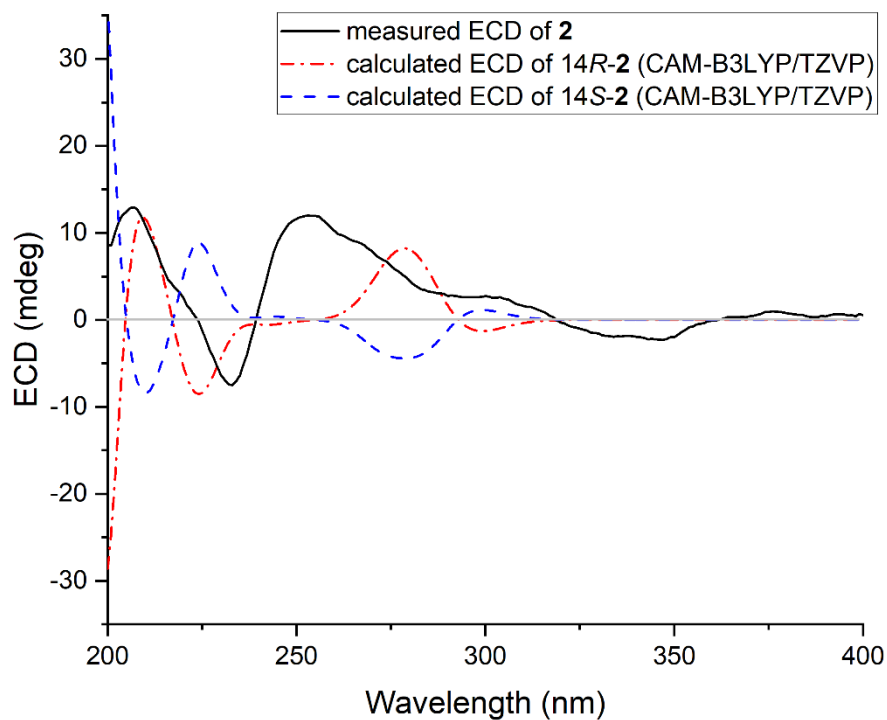

**Table S1.** Crystal data and structure refinement for compounds **1** and **3**.

|                                          |                                                                                                     |                                                                                                    |
|------------------------------------------|-----------------------------------------------------------------------------------------------------|----------------------------------------------------------------------------------------------------|
| Identification code                      | compound <b>1</b>                                                                                   | compound <b>3</b>                                                                                  |
| Empirical formula                        | C <sub>19</sub> H <sub>25</sub> N <sub>3</sub> O <sub>3</sub>                                       | C <sub>48</sub> H <sub>36</sub> N <sub>10</sub> O <sub>9</sub> S <sub>2</sub>                      |
| Formular weight                          | 343.42                                                                                              | 960.99                                                                                             |
| Temperature/K                            | 293(2)                                                                                              | 299(2)                                                                                             |
| Wavelength                               | 1.54178                                                                                             | 1.54178                                                                                            |
| Crytal system, space group               | Orthorhombic, P2 <sub>1</sub> 2 <sub>1</sub> 2 <sub>1</sub>                                         | Orthorhombic, C222 <sub>1</sub>                                                                    |
| Unit cell dimensions                     | a = 13.2384(3) Å, alpha = 90 deg. b = 19.9347(4) Å, beta = 90 deg. c = 6.8103(2) Å, gamma = 90 deg. | a = 9.4022(11) Å, alpha = 90 deg. b = 25.878(4) Å, beta = 90 deg. c = 19.112(2) Å, gamma = 90 deg. |
| Volume/ Å <sup>3</sup>                   | 1797.26(8)                                                                                          | 4650.2(11)                                                                                         |
| Z, Calculated density                    | 4, 1.269 g/cm <sup>3</sup>                                                                          | 4, 1.373 g/cm <sup>3</sup>                                                                         |
| Absorption coefficient/ mm <sup>-1</sup> | 0.702                                                                                               | 1.612                                                                                              |
| F(000)                                   | 736                                                                                                 | 1992                                                                                               |
| Crystal size/mm <sup>3</sup>             | 0.35 × 0.33 × 0.30                                                                                  | 0.20 × 0.18 × 0.15                                                                                 |
| Theta range for data collection/°        | 13.38 to 132.08                                                                                     | 11.512 to 136.928                                                                                  |
| Limiting indices                         | -15 ≤ h ≤ 14, -23 ≤ k ≤ 11,<br>-8 ≤ l ≤ 7                                                           | -11 ≤ h ≤ 11, -30 ≤ k ≤ 28, -22 ≤ l ≤ 23                                                           |
| Reflections collected/unique             | 4007/2826<br>[R <sub>int</sub> = 0.0151, R <sub>sigma</sub> = N/A]                                  | 21138/4267<br>[R <sub>int</sub> = 0.0468, R <sub>sigma</sub> = 0.0334]                             |
| Data/restraints/parameters               | 2826/0/231                                                                                          | 4267/0/301                                                                                         |
| Goodness-of-fit on F <sup>2</sup>        | 1.060                                                                                               | 1.367                                                                                              |
| Final R indices [I > 2σ(I)]              | R <sub>1</sub> = 0.0379, wR <sub>2</sub> = 0.0989                                                   | R <sub>1</sub> = 0.0951, wR <sub>2</sub> = 0.2851                                                  |
| R indices (all data)                     | R <sub>1</sub> = 0.0411, wR <sub>2</sub> = 0.1014                                                   | R <sub>1</sub> = 0.1012, wR <sub>2</sub> = 0.2969                                                  |
| Absolute structure parameter             | 0.0(2)                                                                                              | 0.145(12)                                                                                          |
| Extinction coefficient                   | n/a                                                                                                 | n/a                                                                                                |
| Largest diff. Peak and hole              | 0.13 and -0.19 e Å <sup>-3</sup>                                                                    | 0.49 and -2.49 e Å <sup>-3</sup>                                                                   |

**Table S2.** Calculated specific rotation values at 589.44 nm for the enantiomers 14*R*-2 and 14*S*-2 at the CAM-B3LYP/TZVP level.

| Specific rotation calculation | CAM-B3LYP/TZVP |
|-------------------------------|----------------|
| 14 <i>R</i> -2                | +59.8          |
| 14 <i>S</i> -2                | −59.8          |

**Table S3.** <sup>1</sup>H and <sup>13</sup>C NMR spectroscopic data for compound 3.

| no.   | 3 <sup>a</sup>              |                                                |
|-------|-----------------------------|------------------------------------------------|
|       | δ <sub>C</sub> <sup>a</sup> | δ <sub>H</sub> <sup>b</sup> (J in Hz)          |
| 1     | 167.7, C                    |                                                |
| 2     |                             | 9.04, d, (4.8)                                 |
| 3     | 65.5, CH                    | 5.24, d, (4.8)                                 |
| 4     | 147.4, C                    |                                                |
| 6     | 146.7, C                    |                                                |
| 7     | 127.1, CH                   | 7.74, dd, (8.3, 1.0)                           |
| 8     | 134.5, CH                   | 7.84, ddd, (8.3, 7.3, 1.4)                     |
| 9     | 127.2, CH                   | 7.55, ddd, (8.0, 7.3, 1.0)                     |
| 10    | 126.2, CH                   | 8.13, dd, (8.0, 1.4)                           |
| 11    | 120.7, C                    |                                                |
| 12    | 159.4, C                    |                                                |
| 14    | 53.8, CH                    | 5.26, dd, (5.1, 2.3)                           |
| 15    | 36.1, CH <sub>2</sub>       | 3.06, dd, (14.9, 5.3)<br>2.40, dd, (14.9, 2.3) |
| 17    | 74.0, C                     |                                                |
| 18    | 79.8, CH                    | 4.88, d (1.7)                                  |
| 20    | 63.3, CH                    | 4.07, dq (6.6, 1.7)                            |
| 21    | 165.5, C                    |                                                |
| 23    | 136.0, C                    |                                                |
| 24    | 113.8, CH                   | 7.28, overlap                                  |
| 25    | 129.2, CH                   | 7.28, overlap                                  |
| 26    | 124.4, CH                   | 7.09, m                                        |
| 27    | 124.4, CH                   | 7.41, d, (7.5)                                 |
| 28    | 139.8, C                    |                                                |
| 29    | 14.7, CH <sub>3</sub>       | 1.47, d (6.5)                                  |
| 17-OH |                             | 5.55, br s                                     |

<sup>a</sup>Measured at 125 MHz in DMSO-*d*<sub>6</sub>. <sup>b</sup>Measured at 500 MHz in DMSO-*d*<sub>6</sub>.
